# Supplementary material for: Atomic-scale strain-confined ferroelectricity in fluorite hafnium dioxide
Source: Research Square preprint supplement (doi:10.21203/rs.3.rs-7867840/v1), 2025-11-18
Supplement: Supplementary file 1 [file 05d092537c917992cd45efc8.docx]

**Supplementary Information for**

**Atomic-scale strain-confined ferroelectricity in fluorite hafnium dioxide**

Yihao Shen1,a, Xiaochun Ma2,a, Yuxiao Liu1,a, Hongzheng Wang 2,Shuxian Wang1,*, Fei Liang1, Pengfei Nan2,*, Binghui Ge2, Shujun Zhang3,*, Haohai Yu1,* & Huaijin Zhang1,*

1State Key Laboratory of Crystal Materials and Institute of Crystal Materials, Shandong University, Jinan, China.

2Information Materials and Intelligent Sensing Laboratory of Anhui Province, Leibniz International Joint Research Center of Materials Sciences of Anhui Province, Institutes of Physical Science and Information Technology, Anhui University, Hefei, China.

3Department of Chemistry, City University of Hong Kong, Kowloon, 999077, Hong Kong, China.

aThese authors contributed equally: Yihao Shen, Xiaochun Ma, Yuxiao Liu.

*Corresponding authors

Email: shuxianwang@sdu.edu.cn (S. W.)

npf@ahu.edu.cn (P. N.)

[s.j.zhang@cityu.edu.hk](mailto:s.j.zhang@cityu.edu.hk) (S. Z.)

haohaiyu@sdu.edu.cn (H. Y.)

huaijinzhang@sdu.edu.cn (H. Z.)

Experimental section

The Lu:Hf0.6Zr0.4O2 (Lu:HZO, 9.25 at.% Lu) raw materials were weighed according to the stoichiometric ratio and mixed in ethanol. After drying and grinding, the as-obtained powders were calcined at 1100 oC for 5 hours in a muffle furnace. Subsequently, the sintered powder was ground again and then used to prepare the seed and feed rods, which needed to be pressed under 60 MPa for 10 minutes. The obtained rods were sintered at 1400 oC for 5 hours (air atmosphere). The Lu:HZO bulk crystal was grown via the optical floating zone (OFZ) method employing a slow quenching protocol, following the previous methology1. Subsequent characterization included: X-ray powder diffraction (XRPD) performed on a Rigaku SmartLab diffractometer equipped with Cu Kα radiation (*λ* = 1.5406 Å), utilizing a scan range of 10°–120° 2*θ* at 1°/min for phase identification and structural refinement via Rietveld analysis; Raman spectroscopy acquired with a Horiba iHR550 spectrometer using 632.8 nm He-Ne laser excitation (5 mW power at sample); and second-harmonic generation (SHG) measurements conducted on the same Horiba iHR550 spectrometer coupled with a femtosecond laser source (1030 nm central wavelength, 250 fs pulse width, 200 kHz repetition rate). All measurements were performed at room temperature.

The crystal orientation identification and scanning transmission electron microscopy (STEM) sample preparation of Lu:HZO samples were performed using the Crossbeam 550L dual-beam system from Carl Zeiss. This system combines an electron beam system and a focused ion beam (FIB) system into a single unit, and is outfitted with an electron backscatter detector(EBSD) supplied by Oxford Instruments. The sample preparation process involved electron beam imaging and Ga ion milling to obtain thin film samples suitable for STEM analysis. For microstructural characterization, a ThermoFisher Scientific Themis Z microscope—equipped with double probe correction—was utilized, operating at an acceleration voltage of 300 kV. The four-segment DF4 detector was employed to capture iDPC-STEM images, which had a resolution of 2048 × 2048 pixels; the pixel dwell time during image acquisition was set to 2 μs. The convergence semi-angle was fixed at 25 mrad, while the collection semi-angle for signal detection spanned the range of 6–24 mrad. The four-detector symmetrical, electrically cooled SDD spectrometer is employed for element mapping acquisition(EDS), with a solid angle of no less than 0.7 srad. The multiple-ellipse fitting (MEF) algorithm in CalAtom Software was used to accurately determine the Hf/Zr cation positions. The Hf-O distances were collected in Gatan Microscopy Suite (GMS, v3.22.1461.0) software.

All first-principles calculations were performed using density functional theory (DFT) within the Vienna Ab initio Simulation Package (VASP), employing the projector-augmented-wave (PAW) pseudopotential approach with a plane-wave basis set2,3. Exchange-correlation effects were described by the PBEsol generalized-gradient approximation (GGA)4. Structural optimizations were conducted by relaxing the internal atomic coordinates at fixed lattice parameters until the maximum Hellmann-Feynman force fell below 0.001 eV/Å, with a total-energy convergence threshold of 1×10-7 eV. We used a plane-wave cutoff energy of 600 eV and a *k*-point sampling grid defined by a reciprocal-space spacing of 0.04 Å-1. The relative stabilities of the *o*-FE and *o*-AFE phases were evaluated based on the normalized total energies per formula unit at 0K. The standard structures of the *m*, *o*-AFE, and *o*-FEphases are from Ref.5. The formation energy difference Δ*E* = *E* − *Em*,where *E* and *Em* represent the formation energies of the *o* phases and the *m* phase.


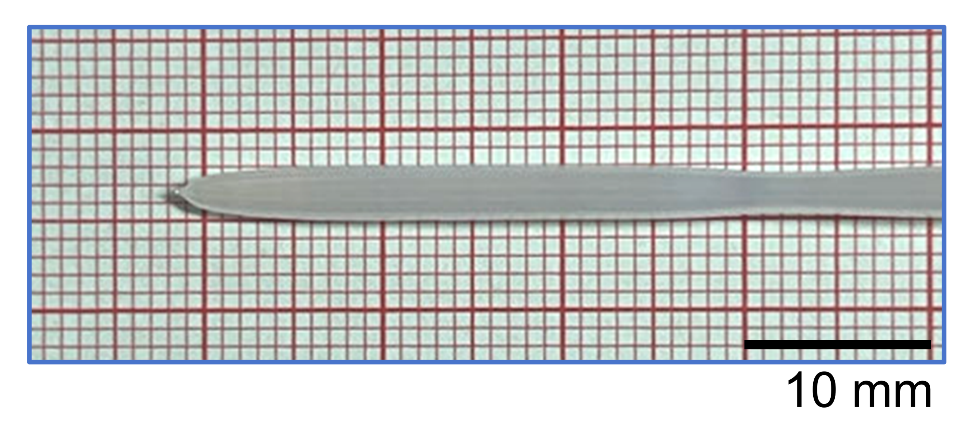


Supplementary Fig. 1. As-grown Lu:HZO (9.25 at.%) bulk crystal. Scale bar: 10 mm.


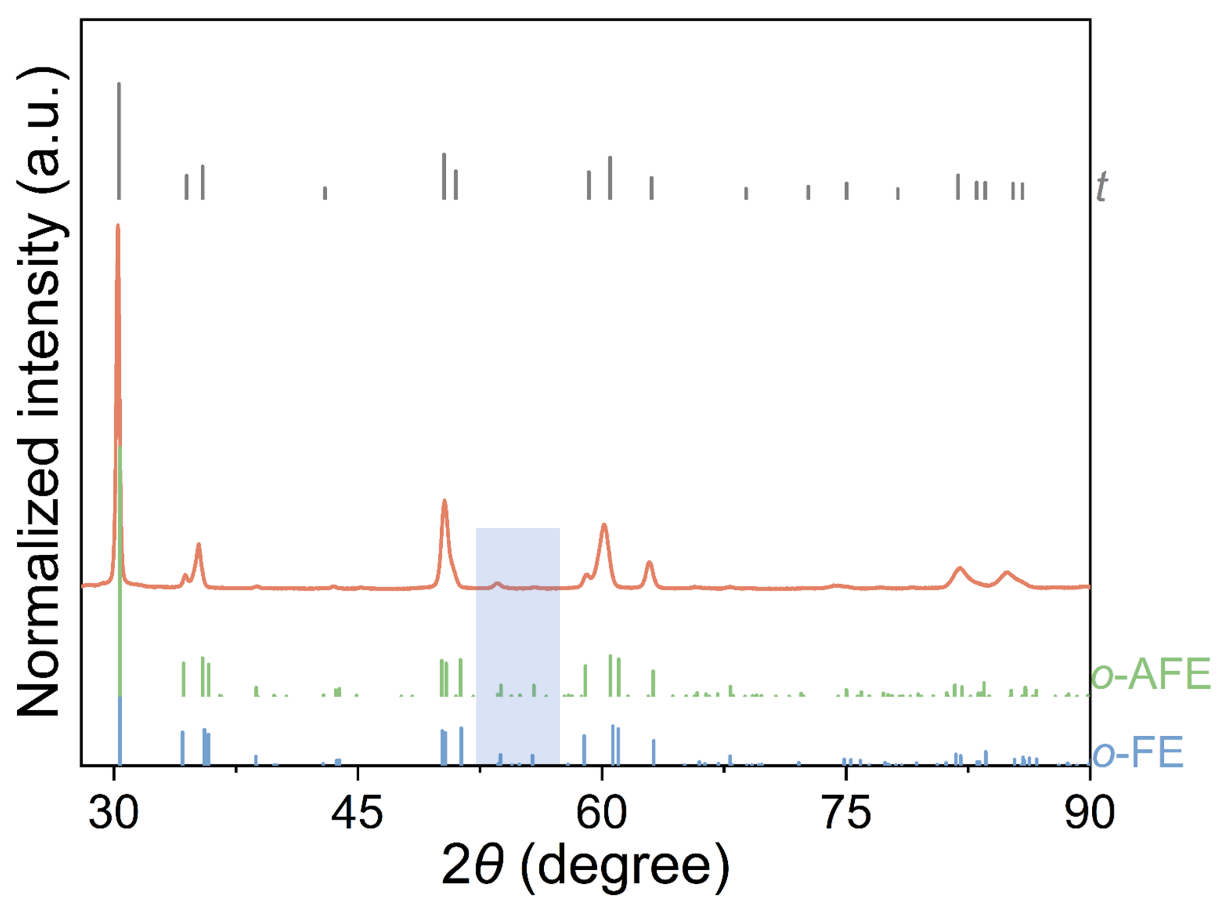


Supplementary Fig. 2. Room-temperature XRPD data of the Lu:HZO bulk crystal. The standard cards of the *t*, *o*-AFE, and *o*-FE phases correspond to ICSD Nos. 173966, 79913, and Ref.6.


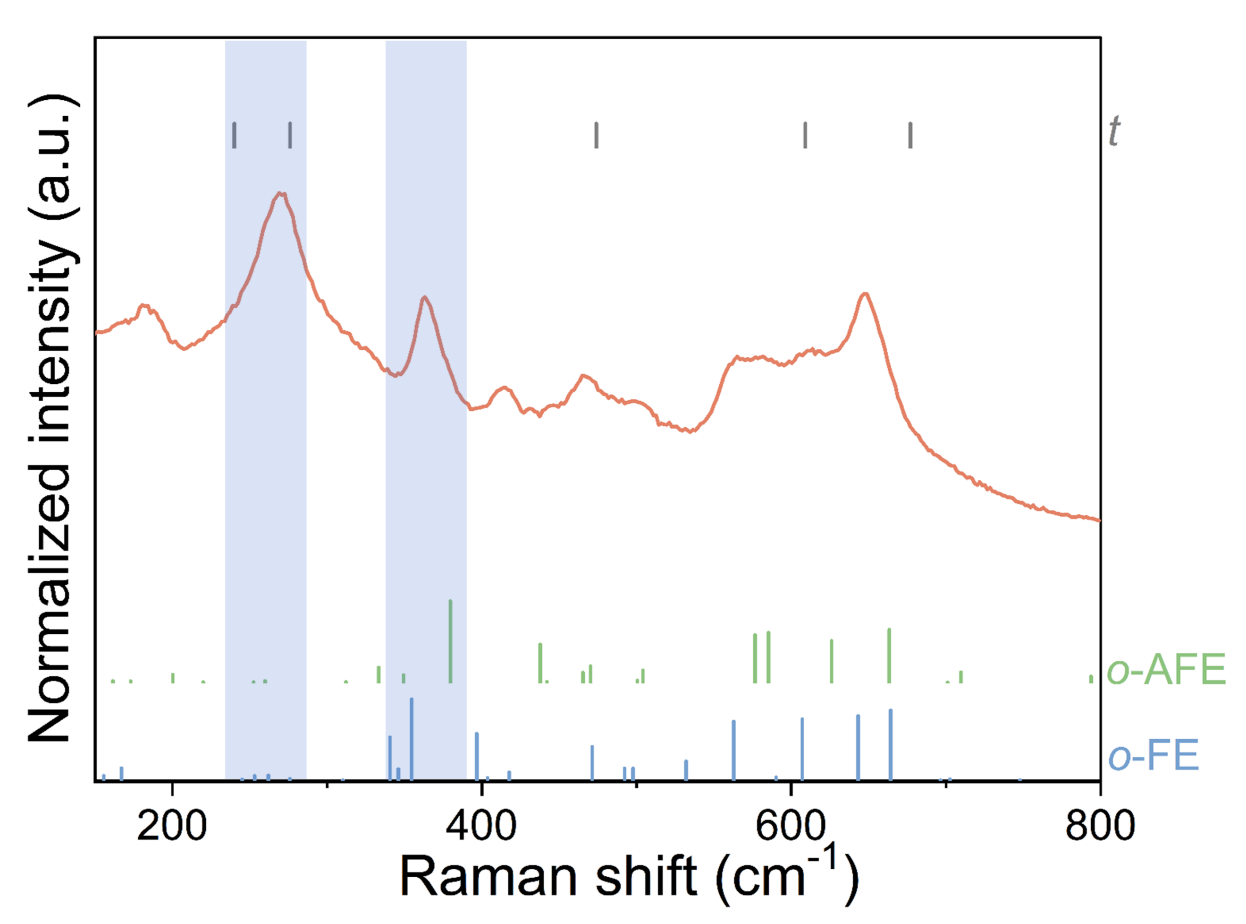


Supplementary Fig. 3. Room-temperature Raman spectrum of the Lu:HZO bulk crystal. The theoretical Raman spectra of the *t*, *o*-AFE, and *o*-FEphases are from Ref.7.


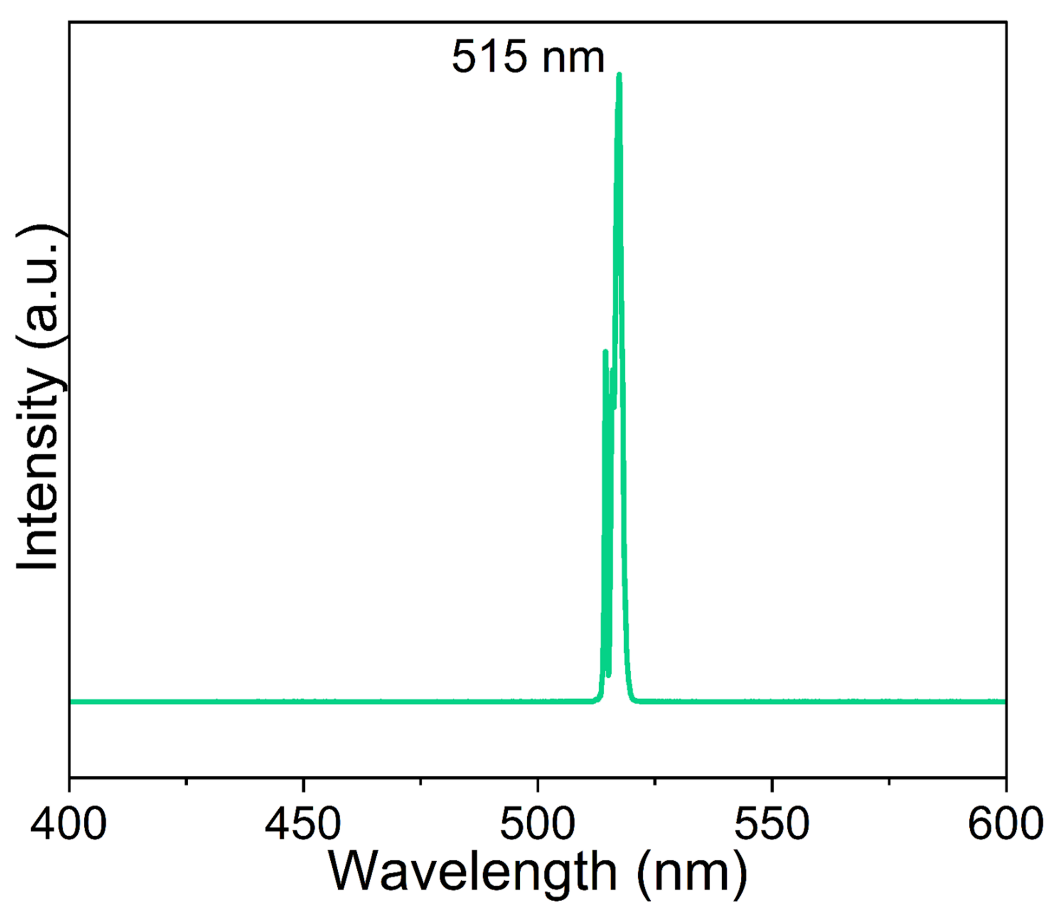


Supplementary Fig. 4. Room-temperature SHG spectrum of the Lu:HZO bulk crystal.


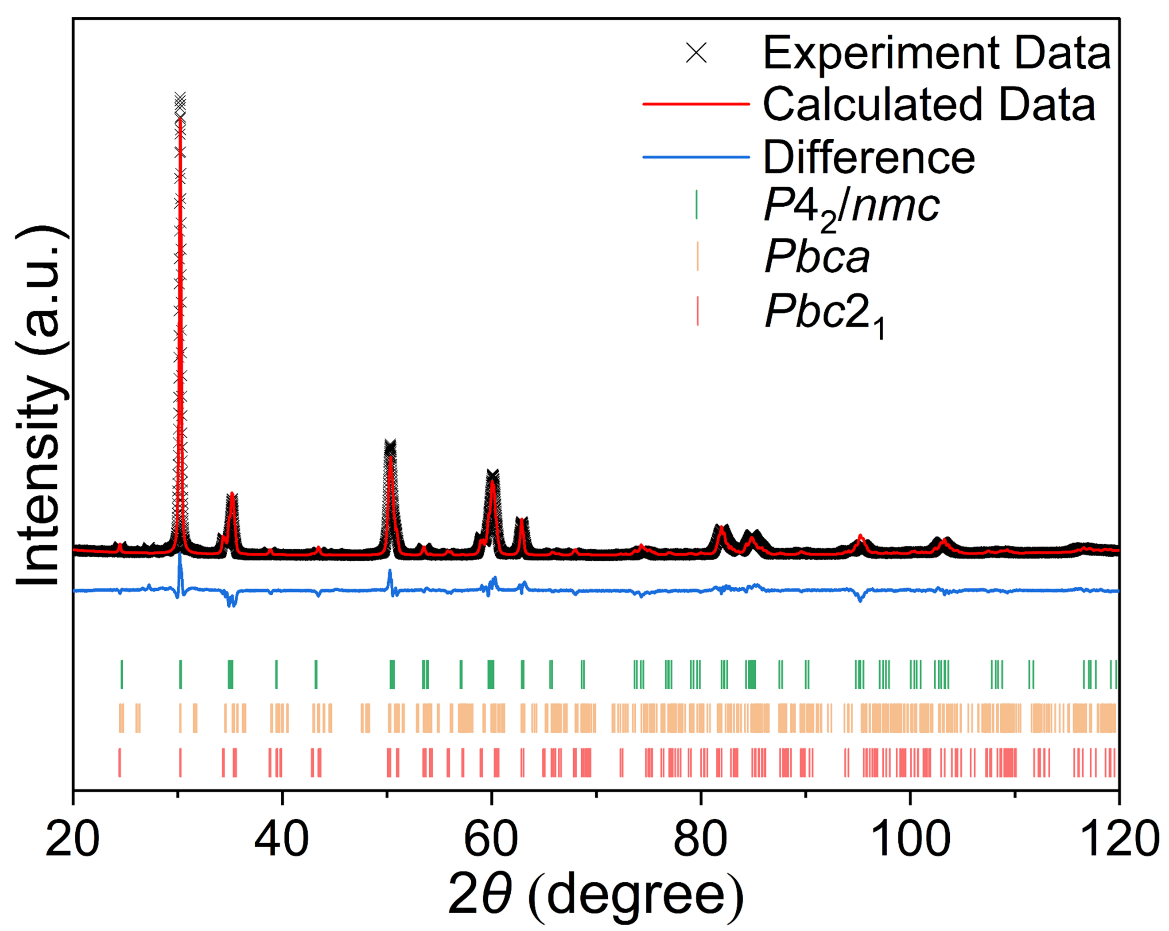


Supplementary Fig. 5. Refined XRPD data of the Lu:HZO crystal (*Rwp* = 7.79%). The phase components of the *t*, *o*-AFE, and *o*-FEphases are 56.03%, 29.93%, and 14.04%, respectively.


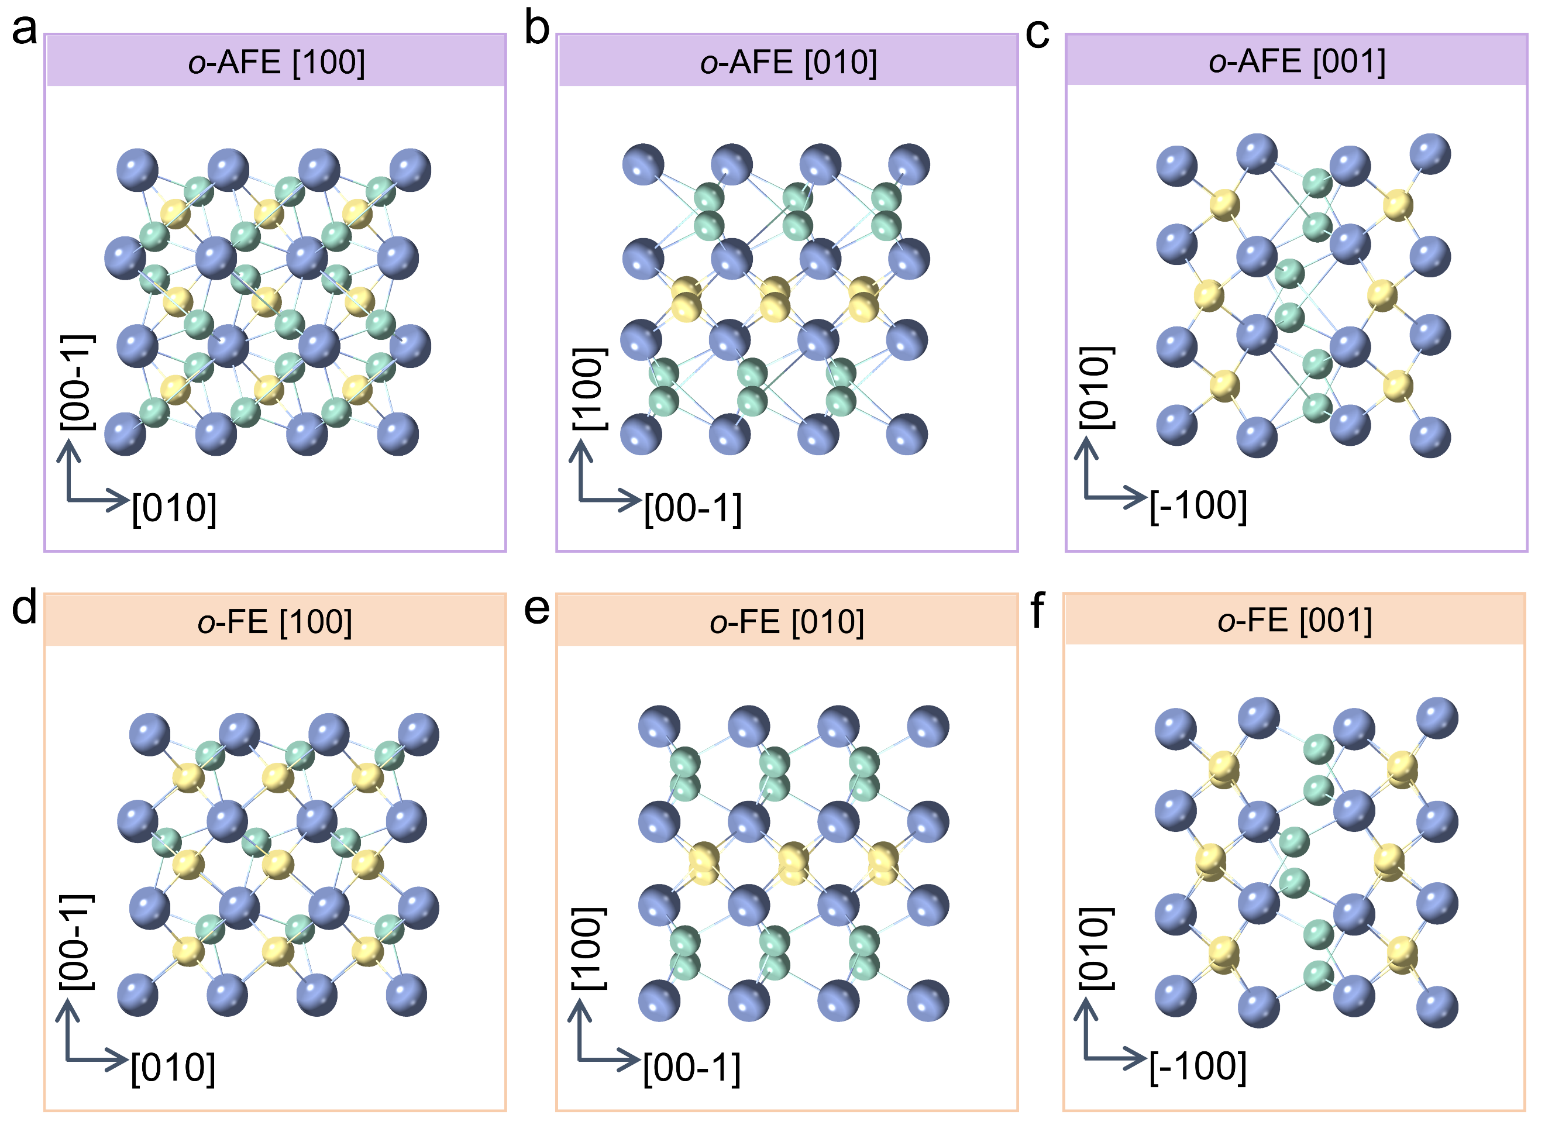


Supplementary Fig. 6. Atomic configurations of *o*-AFE and *o*-FE phases. a-c, *o*-AFE phase viewed along the *a*-axis, *b*-axis, and *c*-axis. d-f, *o*-FE phase viewed along the *a*-axis, *b*-axis, and *c*-axis.


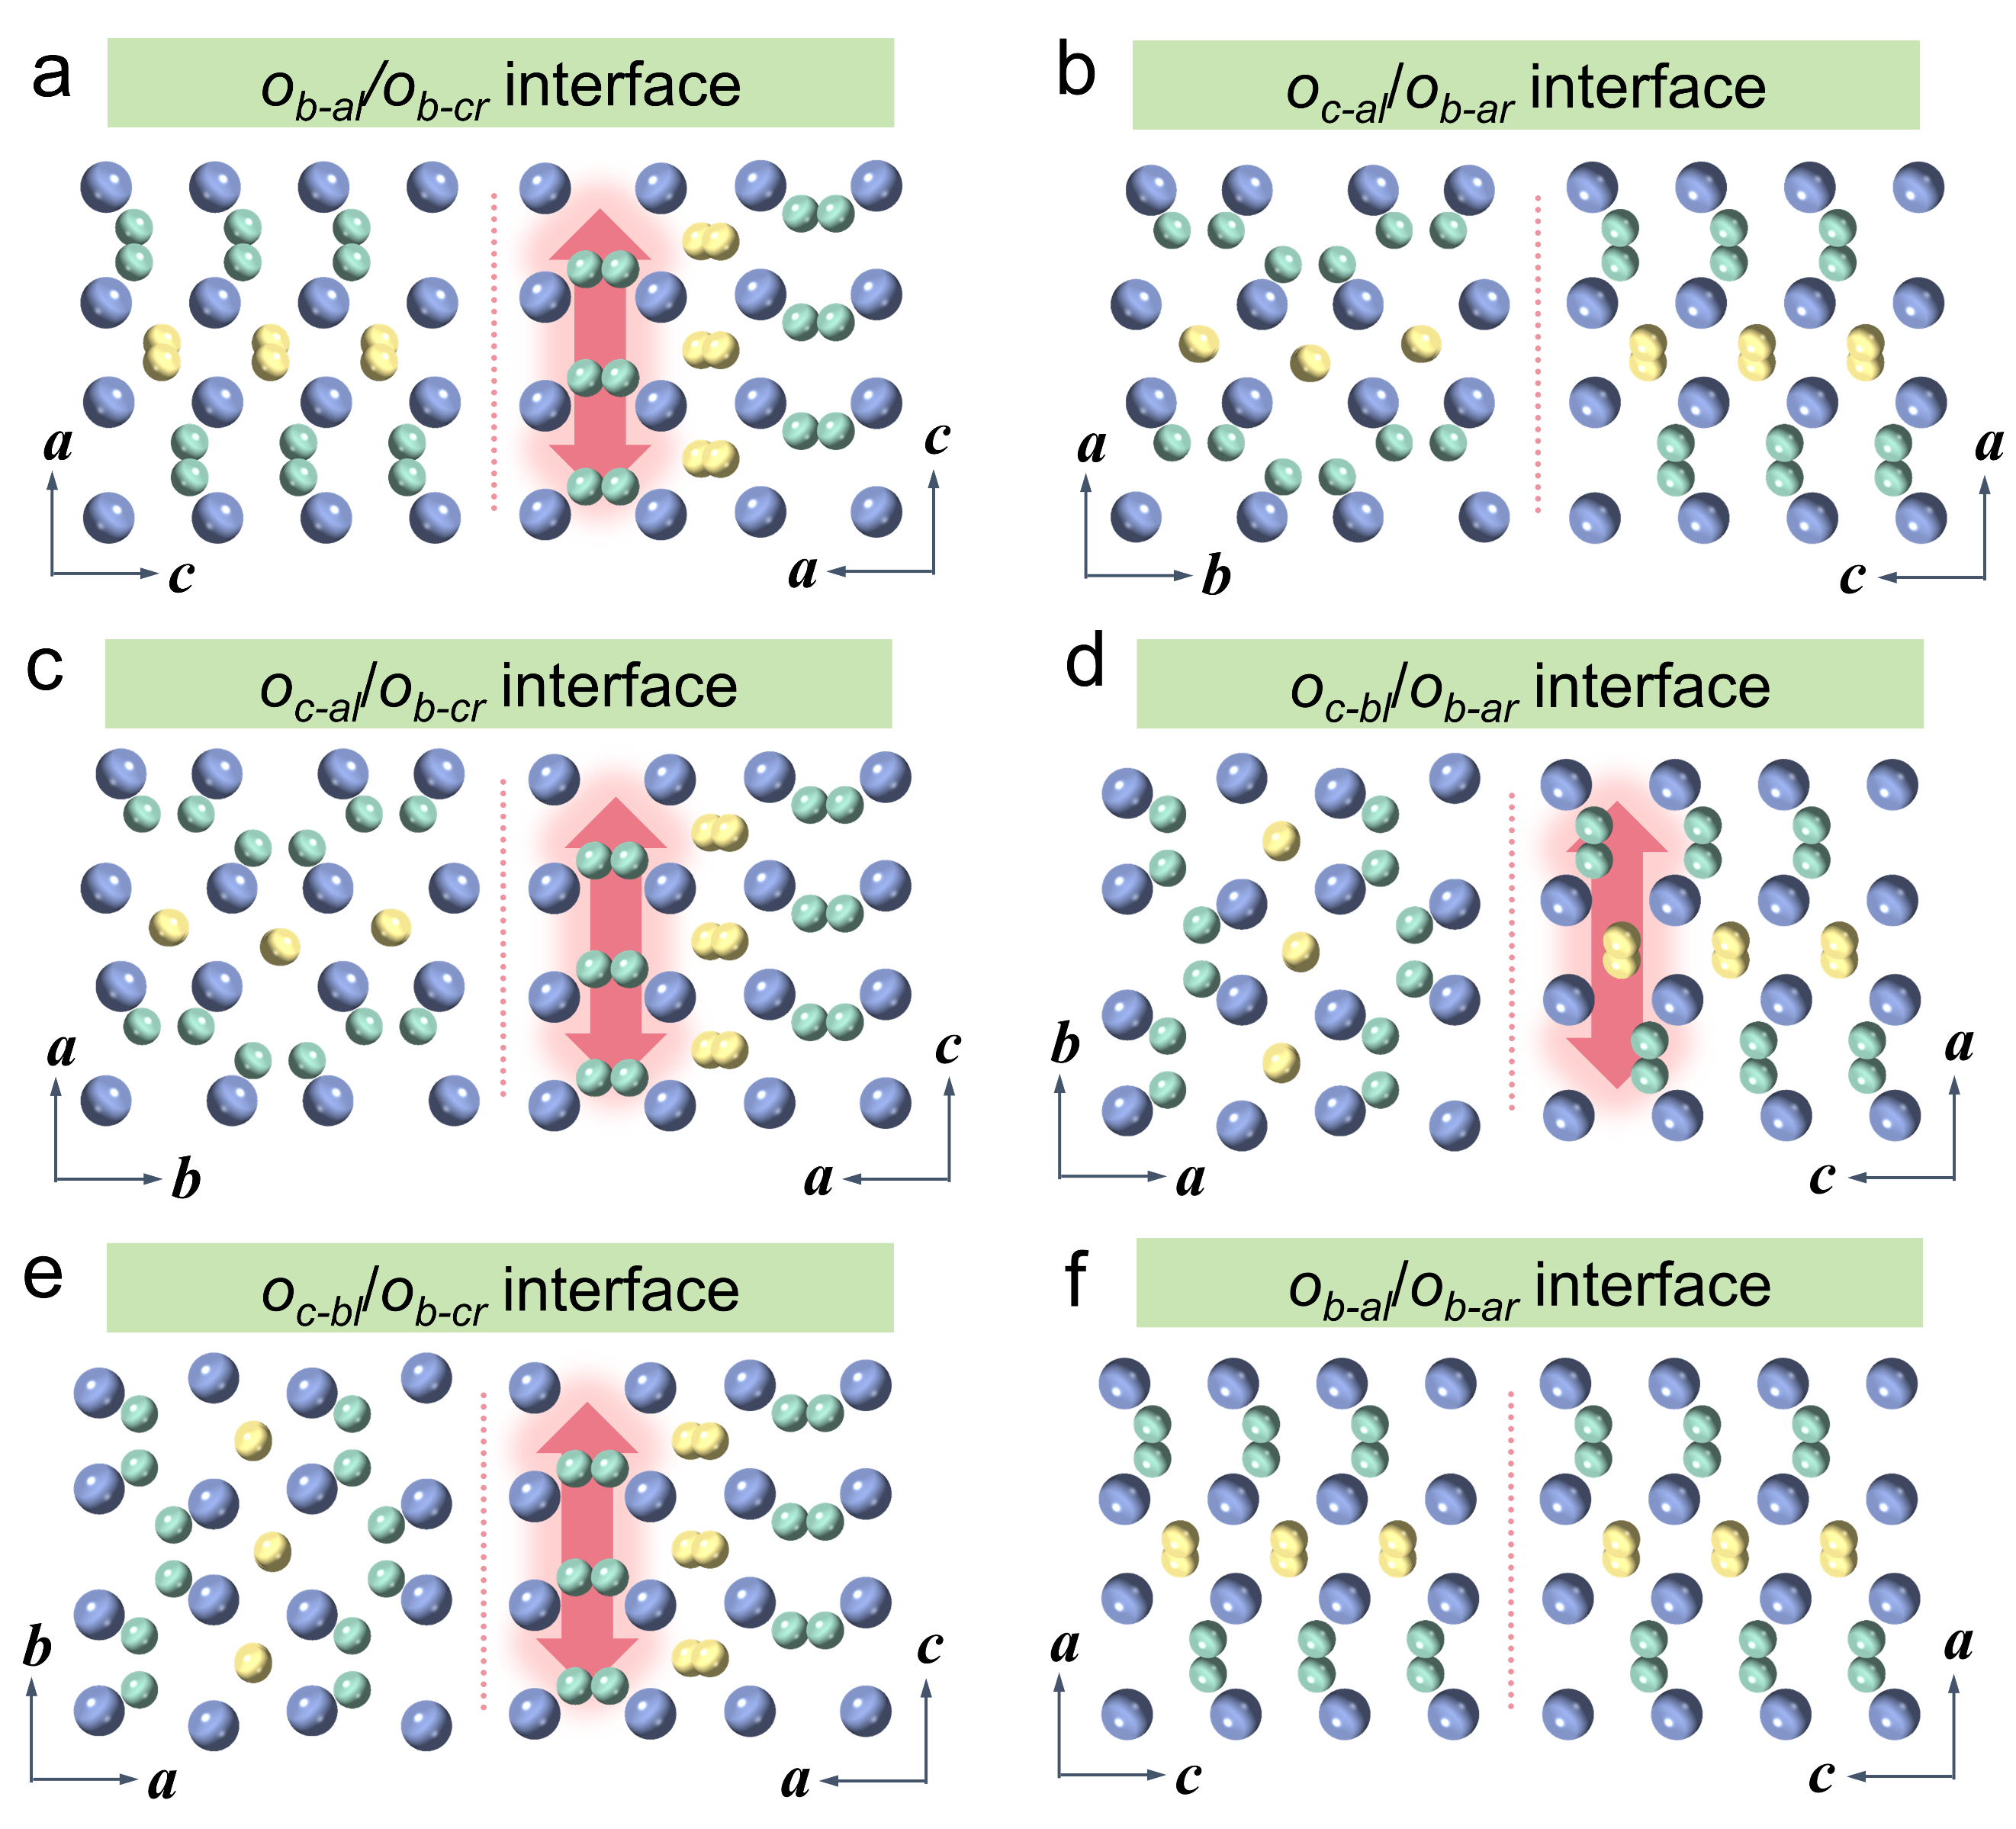


Supplementary Fig. 7. Vertical views of atomic arrangements at the coherent *o*-phase interfaces. Schematics depicting interfacial atomic arrangements where at least one *o*-phase is *b*-axis-oriented (drawn by the *o*-AFE phase). a, *ob*-*al*/*ob*-*cr*-type coherent interface (*Group* 1). b,c, *oc*-*al*/*ob*-*ar*-type and *oc*-*al*/*ob*-*cr*-type coherent interfaces (*Group* 3). d,e, *oc*-*bl*/*ob*-*ar*-type and *oc*-*bl*/*ob*-*cr*-type coherent interfaces (*Group* 4). f, *ob*-*al*/*ob*-*ar*-type coherent interface (*Group* 1). The arrows represent the tensile strain along the principal axes.

**
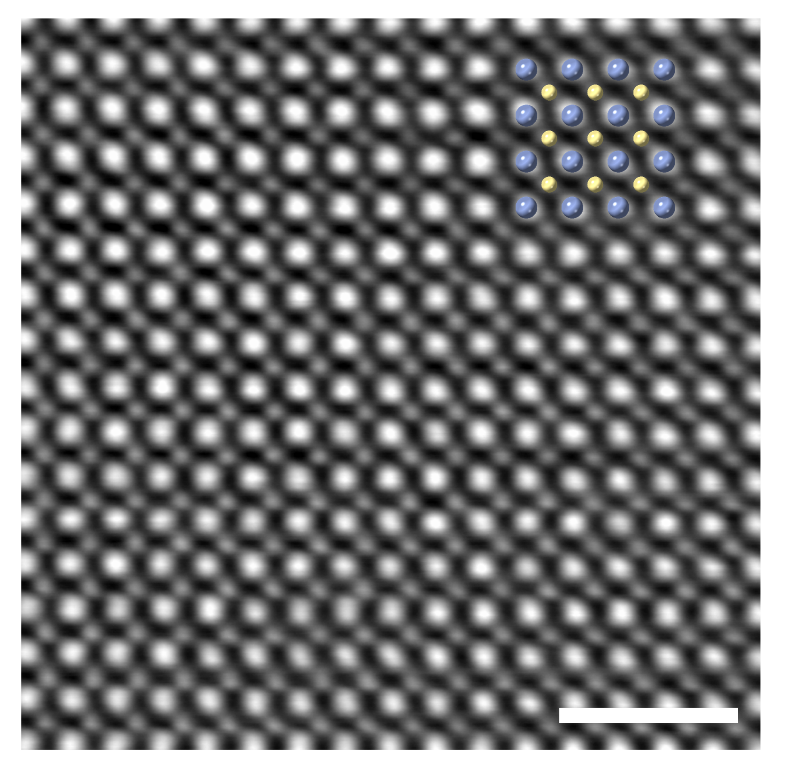
**

Supplementary Fig. 8. iDPC-STEM image of a *c*-axis-oriented tetragonal phase within the Lu:HZO bulk crystal. The inset shows corresponding theoretical atomic models, demonstrating strong agreement with experimental observations. Scale bar: 1 nm.

**
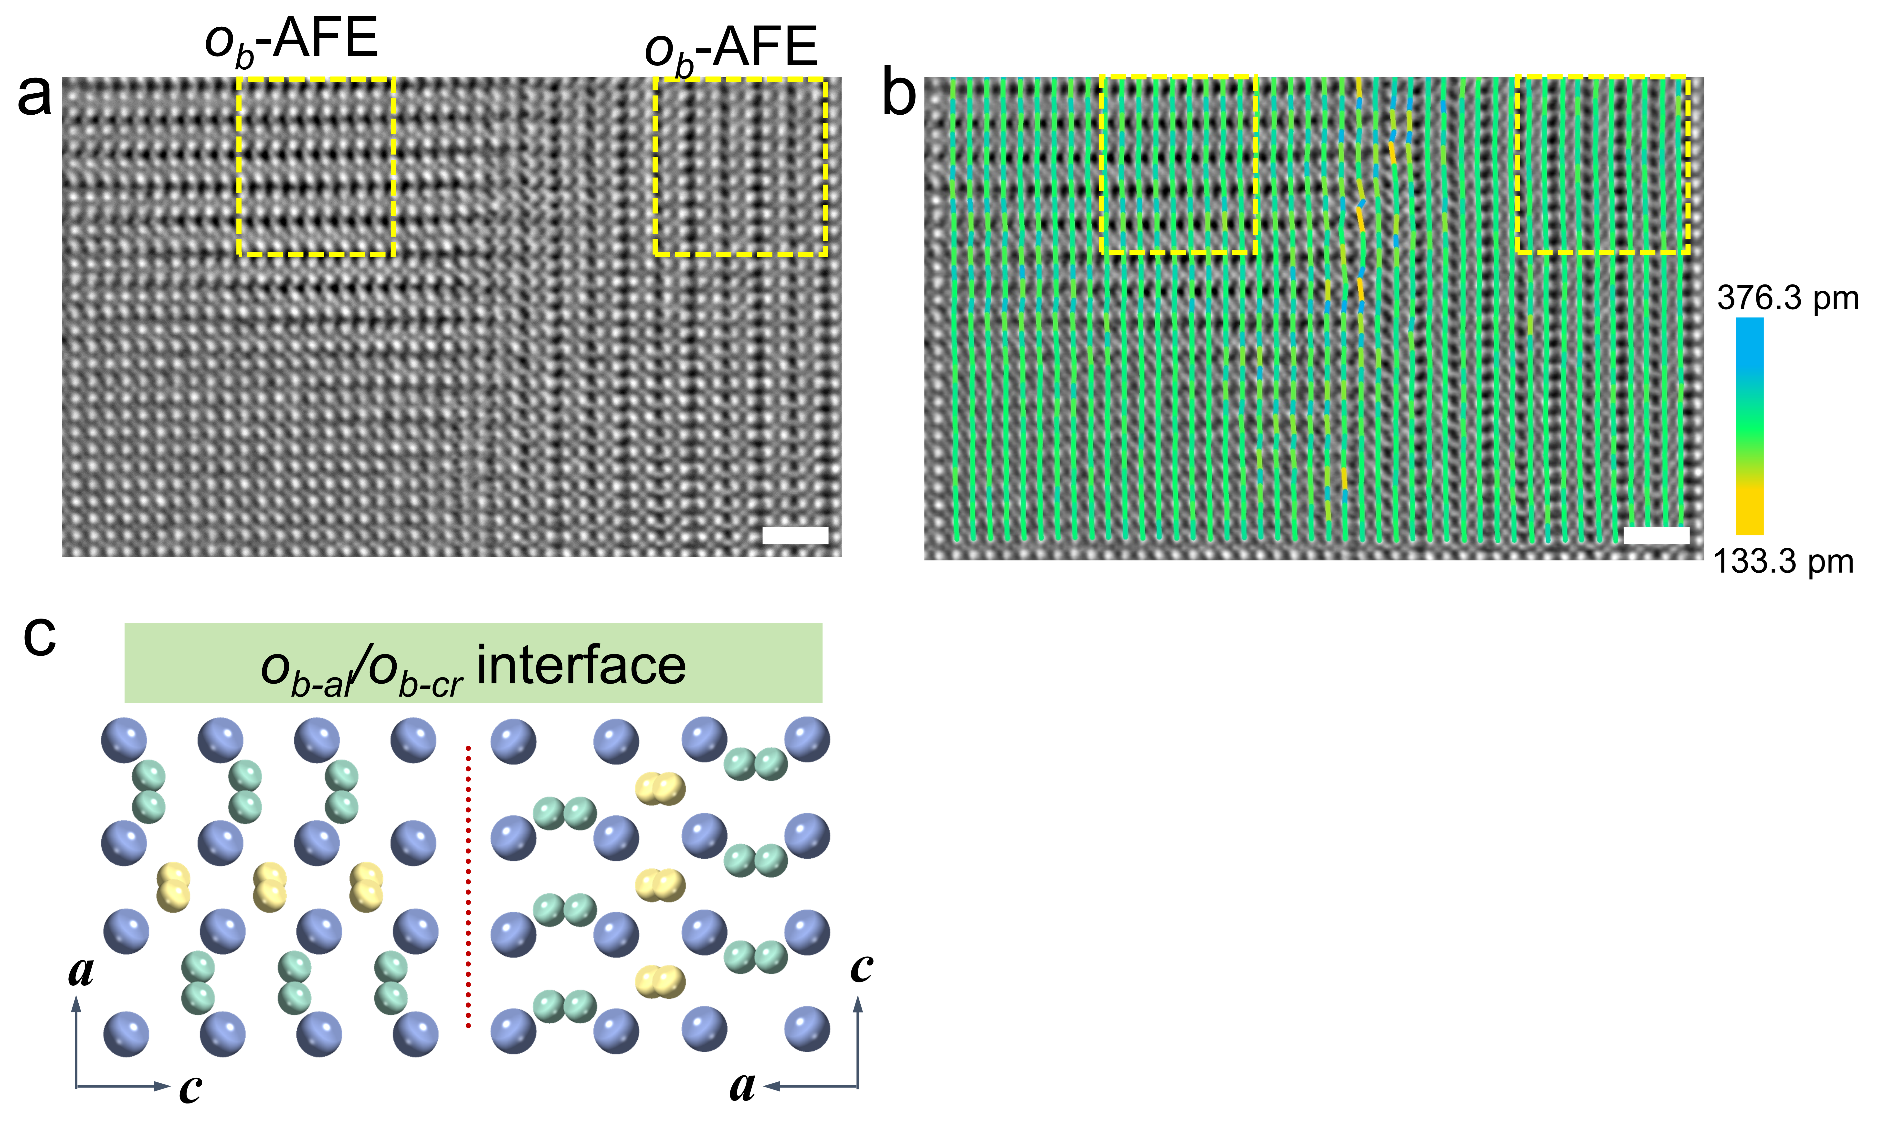
**

Supplementary Fig. 9. Observed *ob*-*al*/*ob*-*cr*-type coherent interface connecting the *c*-axis and *b*-axis oriented *o*-phases within the Lu:HZO crystal. a, Raw iDPC-STEM image including *ob*-*al*/*ob*-*cr*-type coherent interfaces. b, Vertical Hf-Hf atomic distance distribution. c, Corresponding atomic-arrangement diagrams of the *ob*-*al*/*ob*-*cr*-type coherent interface. The strains are calculated based on the average Hf-Hf distance of the region enclosed by the dashed line in the different *o*-phases. The statistical average vertical strain applied to the right *o*-phase along the *c*-axis at the coherent interface is 0.13%. Scale bar: 1 nm.


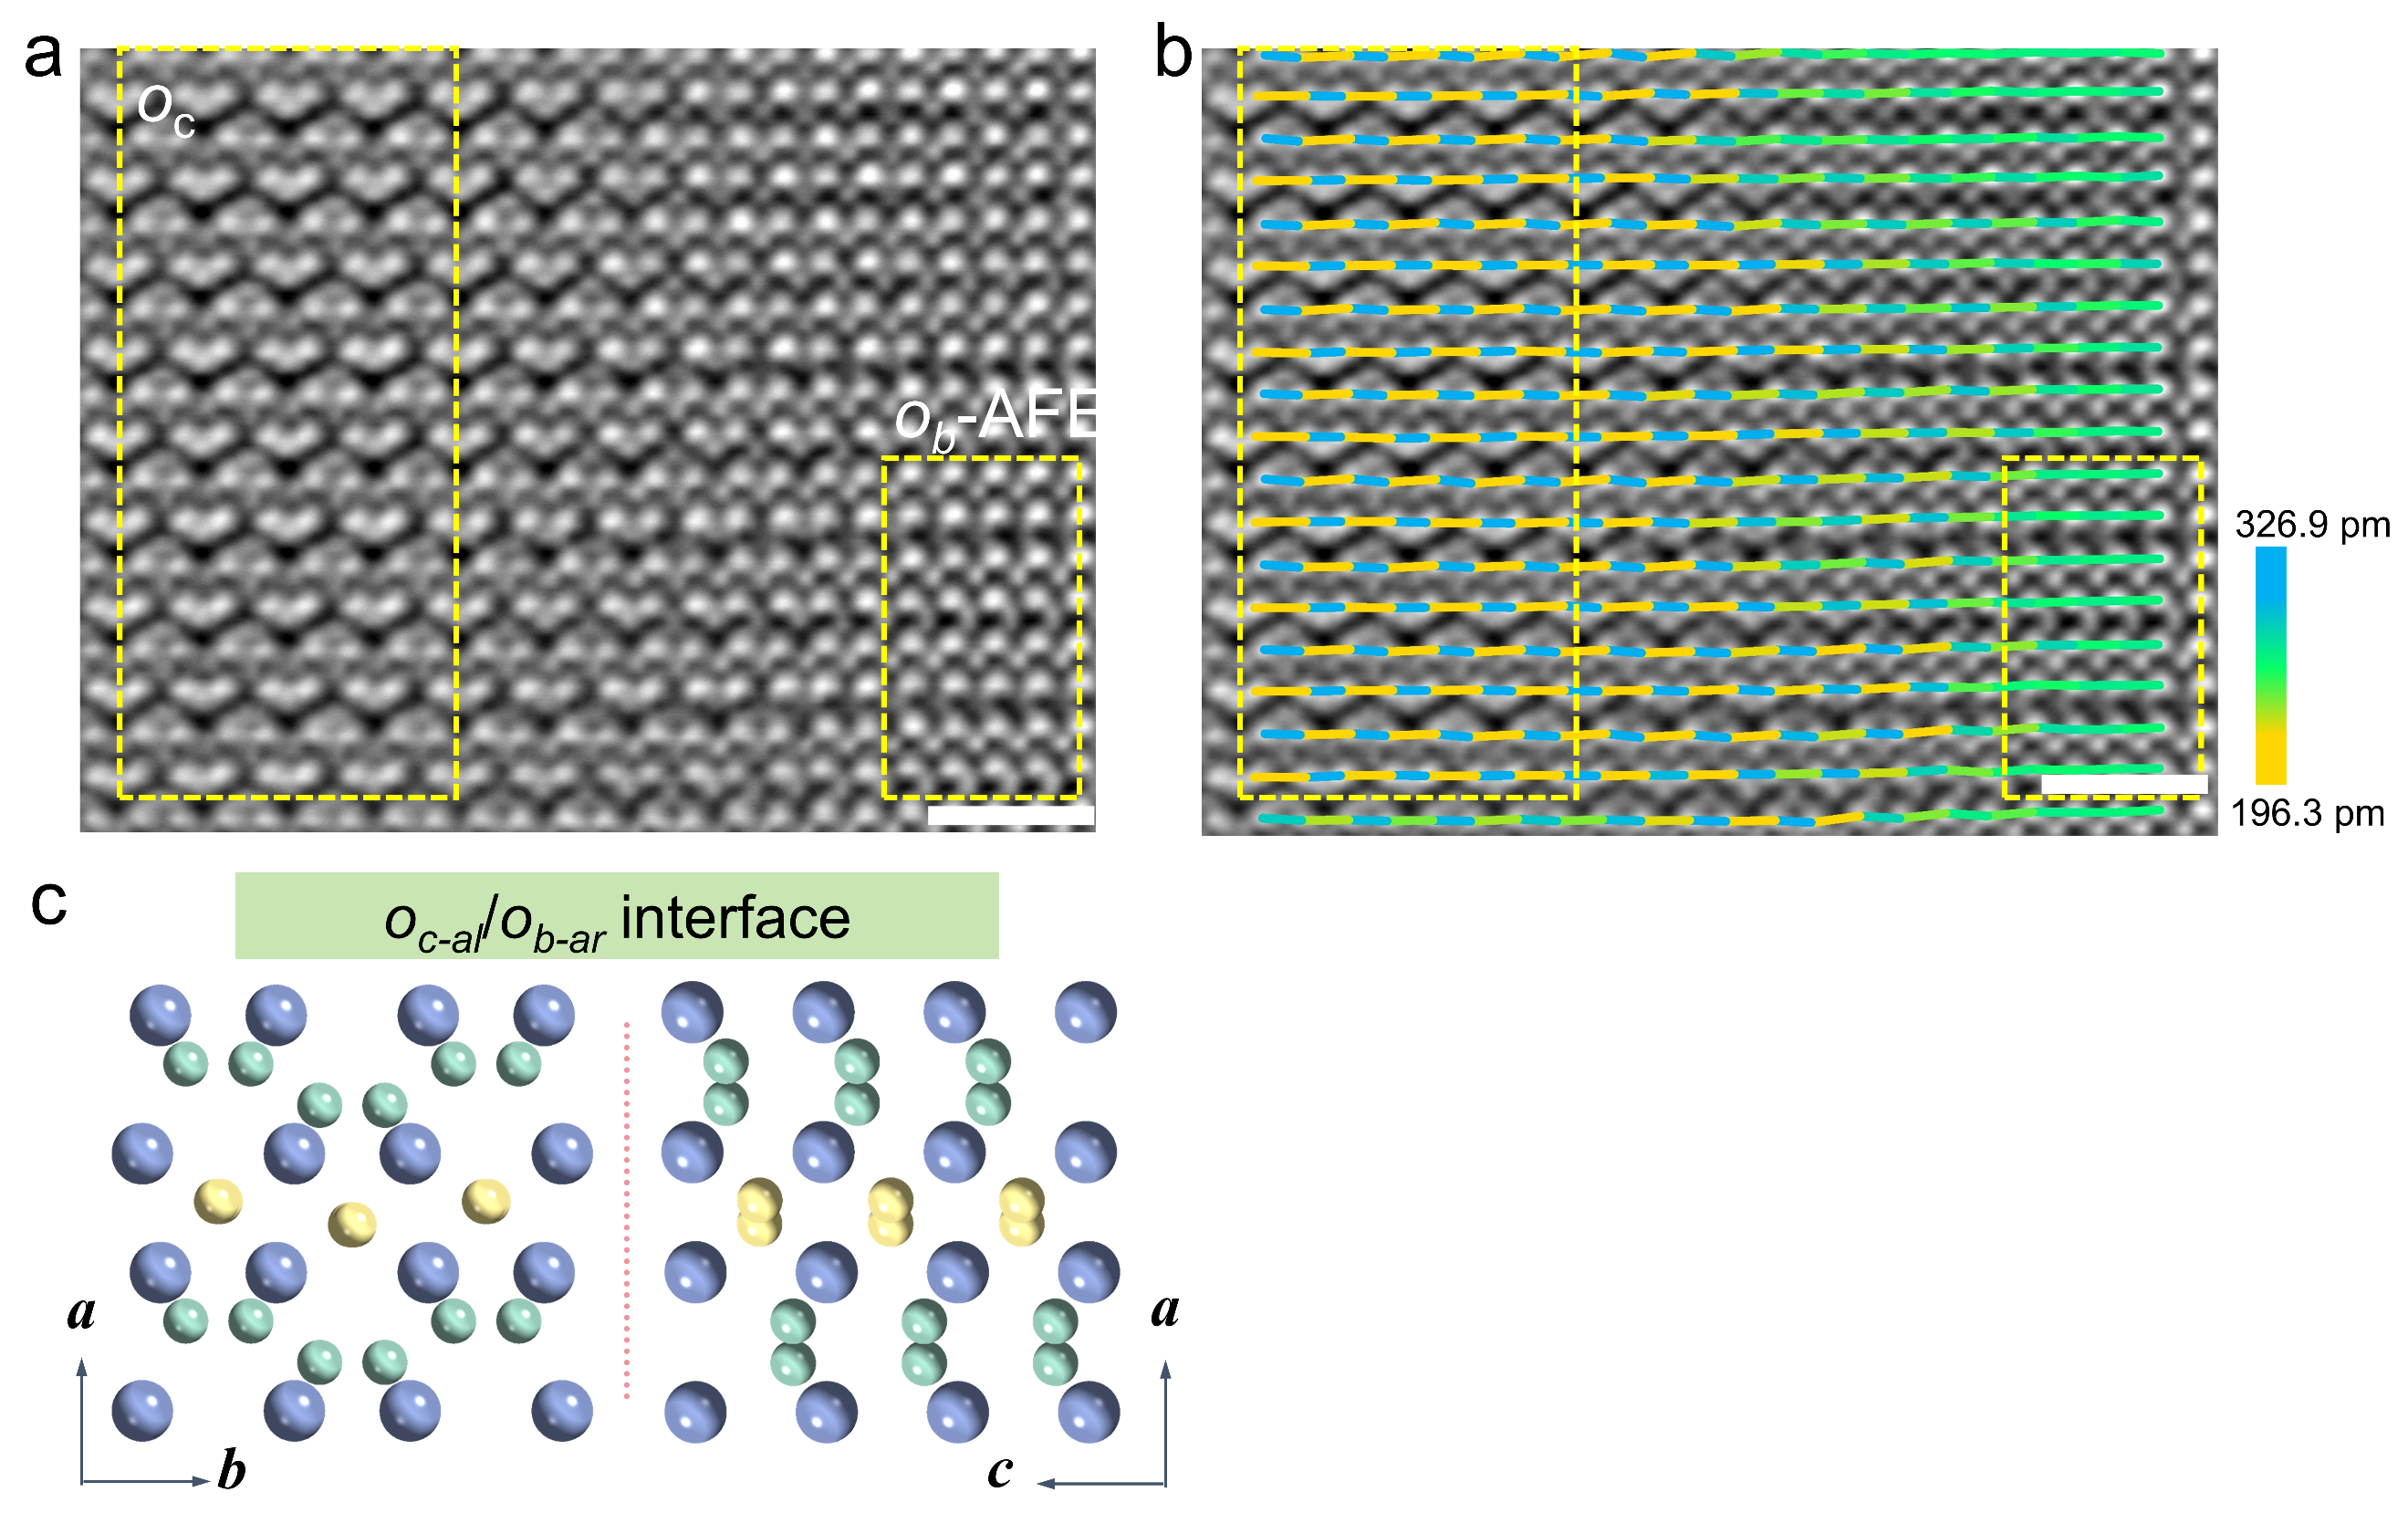


Supplementary Fig. 10. Observed *oc*-*al*/*ob*-*ar*-typecoherent interface connecting the *c*-axis and *b*-axis oriented *o*-phases within the Lu:HZO crystal. a, Raw iDPC-STEM image for the *oc*-*al*/*ob*-*ar*-type coherent interface. b, Horizontal Hf-Hf atomic distance distribution. c, Corresponding atomic-arrangement diagram of the *oc*-*al*/*ob*-*ar*-type coherent interface. The strains are calculated based on the average Hf-Hf bond length of the region enclosed by the dashed line in the different *o*-phases. The statistical average vertical strain applied to the right *o*-phase at the coherent interface is 0.16%. Scale bar: 1 nm.


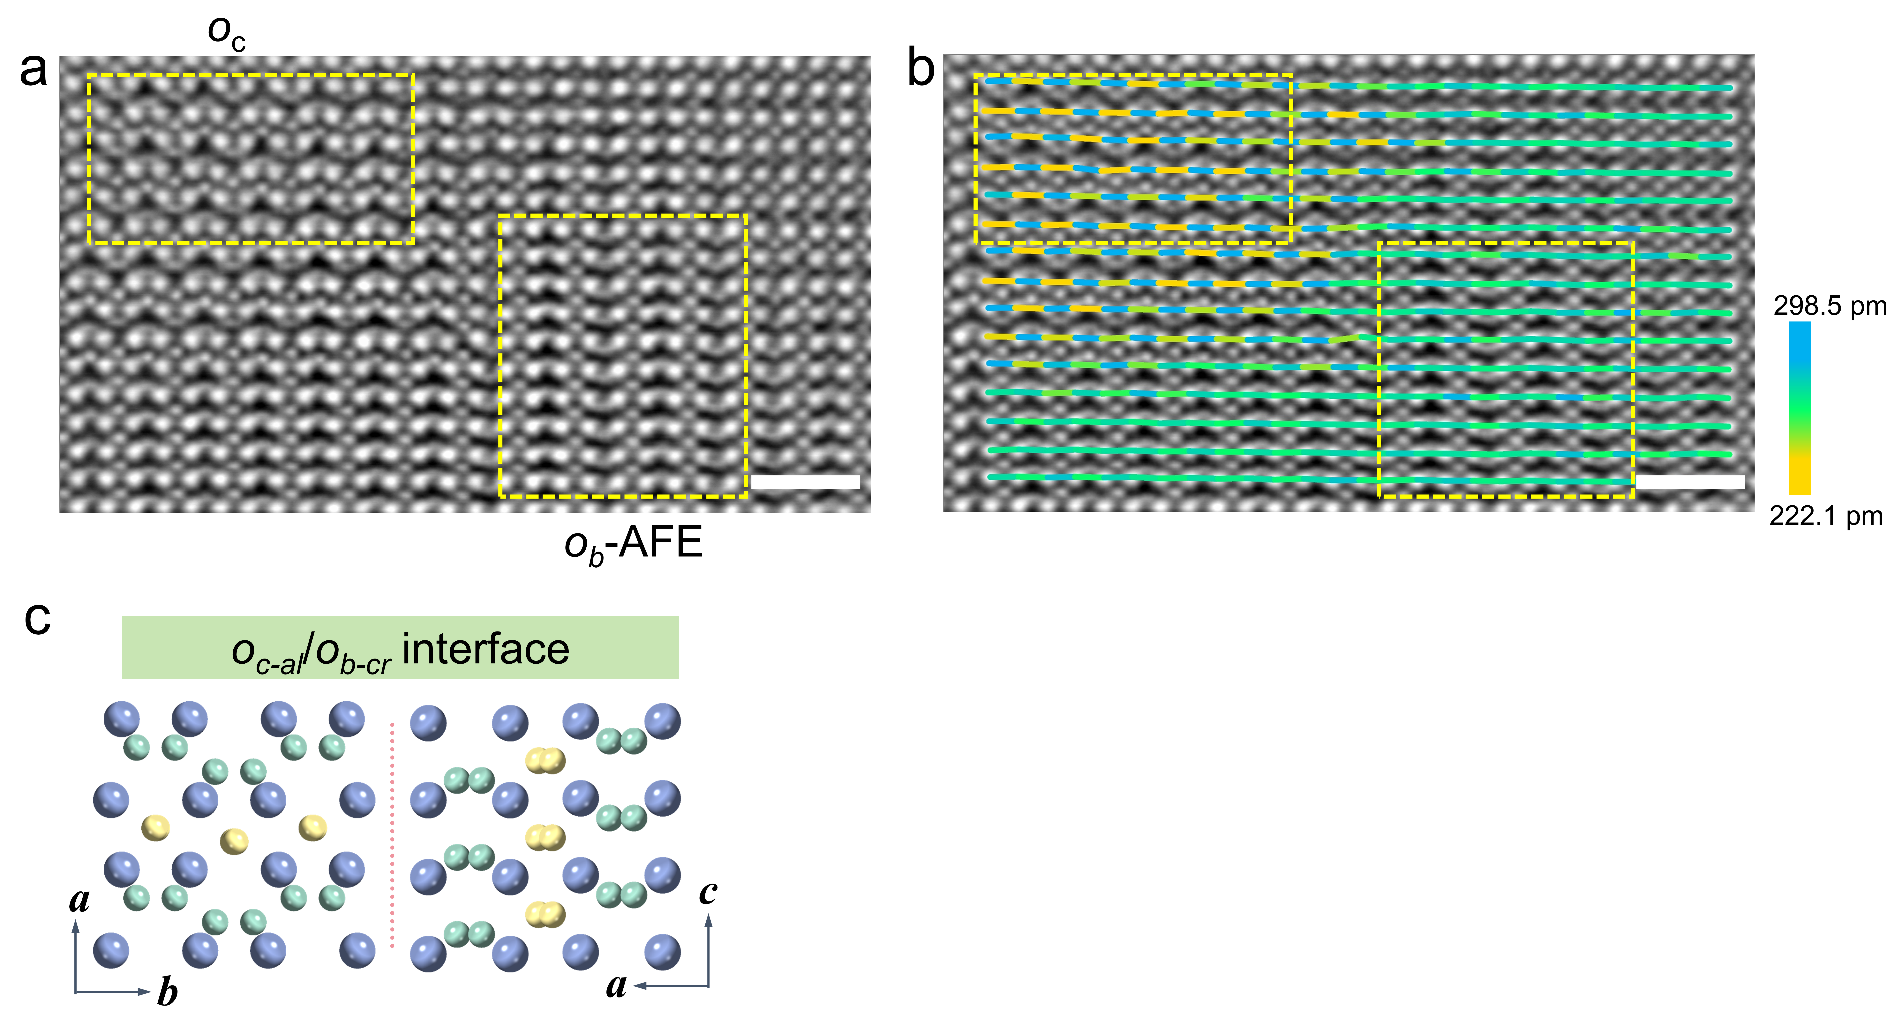


**Supplementary Fig. 11. Observed** *oc*-*al*/*ob*-*cr*-type **coherent interface connecting the *c*-axis and *b*-axis oriented *o*-phases within the Lu:HZO crystal.** a, Raw iDPC-STEM image for the *oc*-*al*/*ob*-*cr*-type coherent interface. b, Horizontal Hf-Hf atomic distance distribution. c, Corresponding atomic-arrangement diagram of the *oc*-*al*/*ob*-*cr*-type coherent interface. The strains are calculated based on the average Hf-Hf bond length of the region enclosed by the dashed line in the different *o*-phases. The statistical average vertical strain applied to the right *o*-phase at the coherent interface is 0.58%. Scale bar: 1 nm.


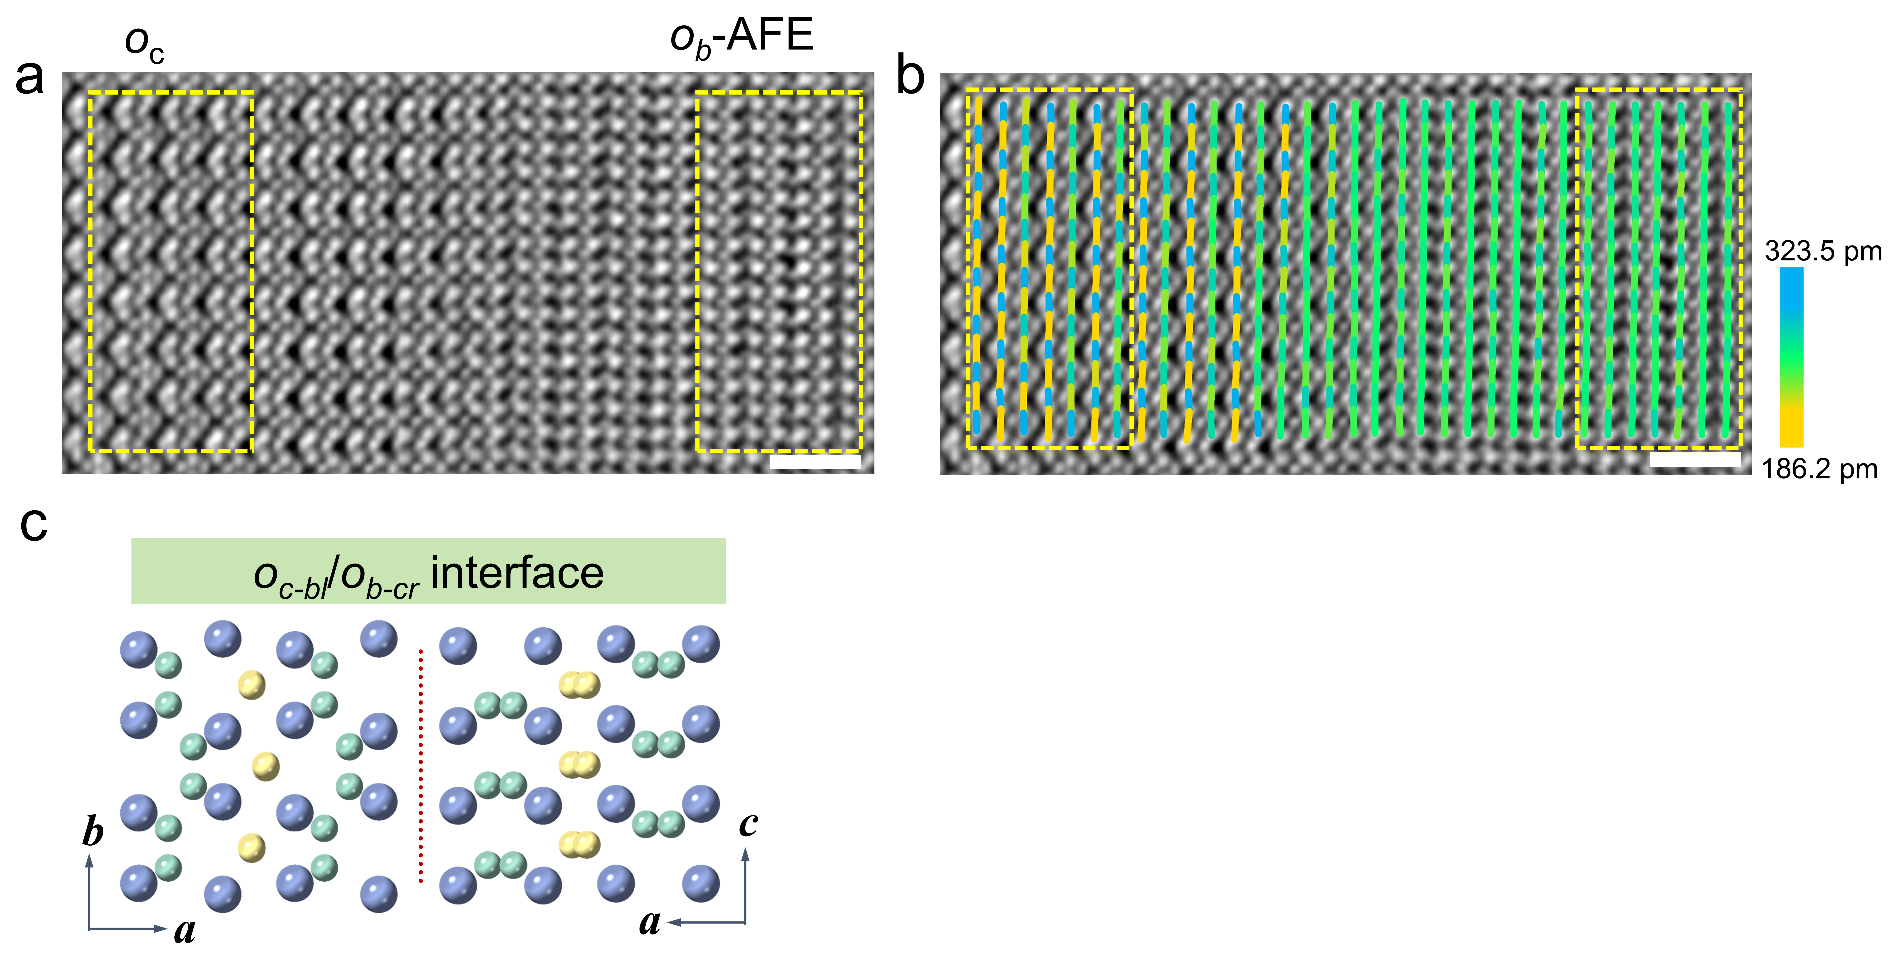


Supplementary Fig. 12. Observed *oc*-*bl*/*ob*-*cr*-typecoherent interface connecting the *c*-axis and *b*-axis oriented *o*-phases within the Lu:HZO crystal. a, Raw iDPC-STEM image for the *oc*-*bl*/*ob*-*cr*-type coherent interface. b, Vertical Hf-Hf atomic distance distribution. c, Corresponding atomic-arrangement diagram of the *oc*-*bl*/*ob*-*cr*-type coherent interface. The strains are calculated based on the average Hf-Hf bond length of the region enclosed by the dashed line in the different *o*-phases. The statistical average vertical strain applied to the right *o*-phase at the coherent interface is 0.5%. Scale bar: 1 nm.


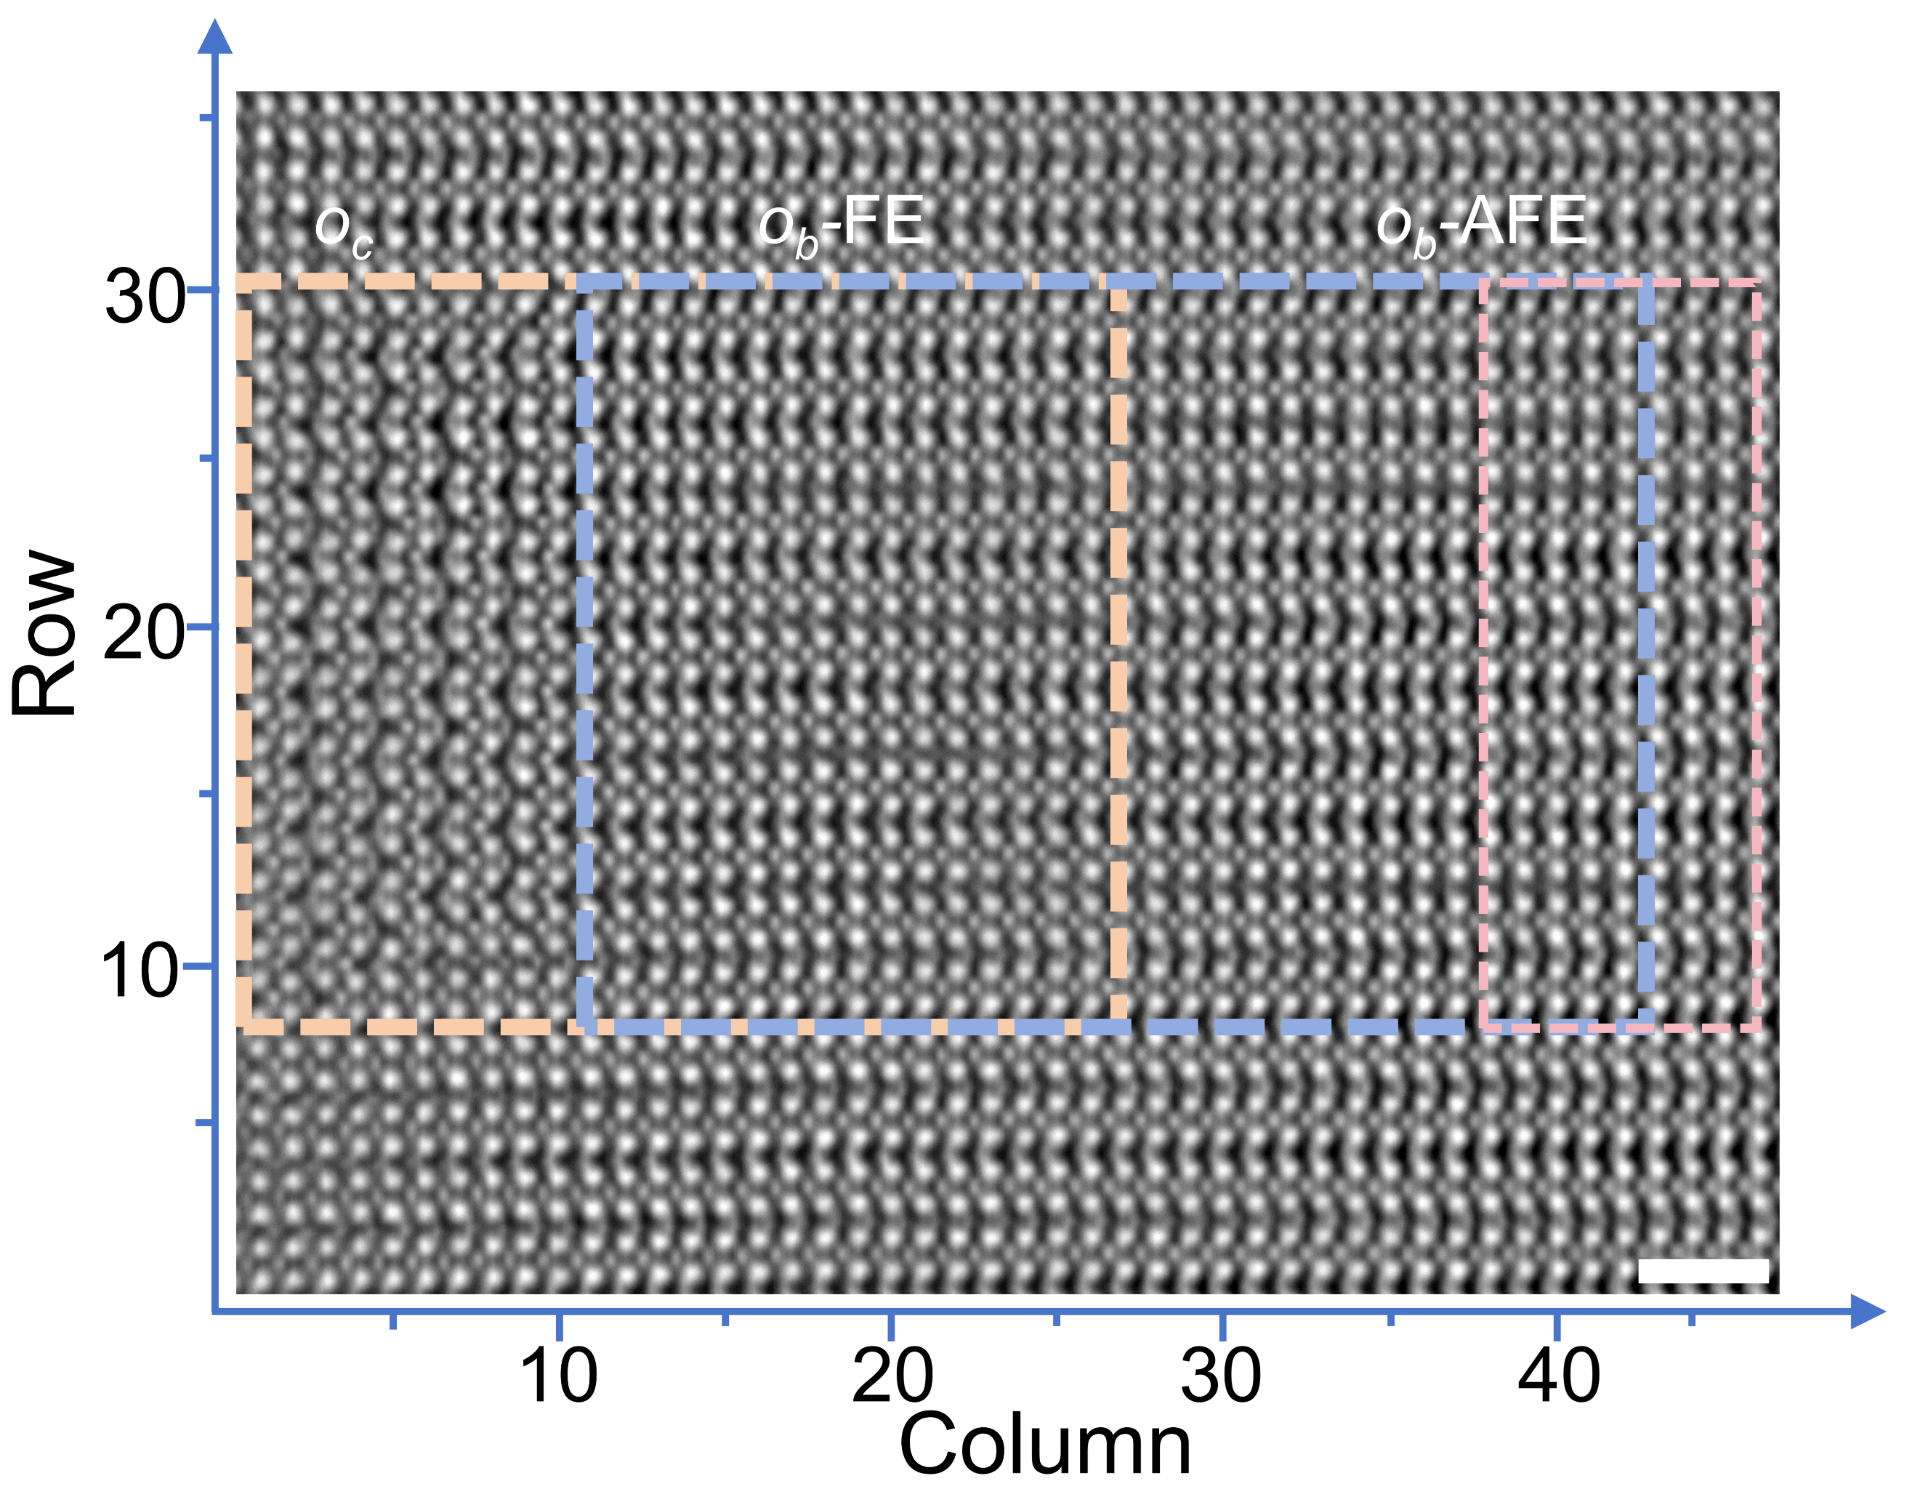


Supplementary Fig. 13. Atomic revolution iDPC-STEM imaging of coherent interfaces between the *o*-phases. The image shows interfacial regions of *oc*, *ob*-FE, and *ob*-AFE phases (left to right). The orange-dashed region denotes Fig. 4, while the blue-dashed region corresponds to Fig. 5. The pink-dashed region defines the reference state for the strain calculation. Scale bar: 1 nm.


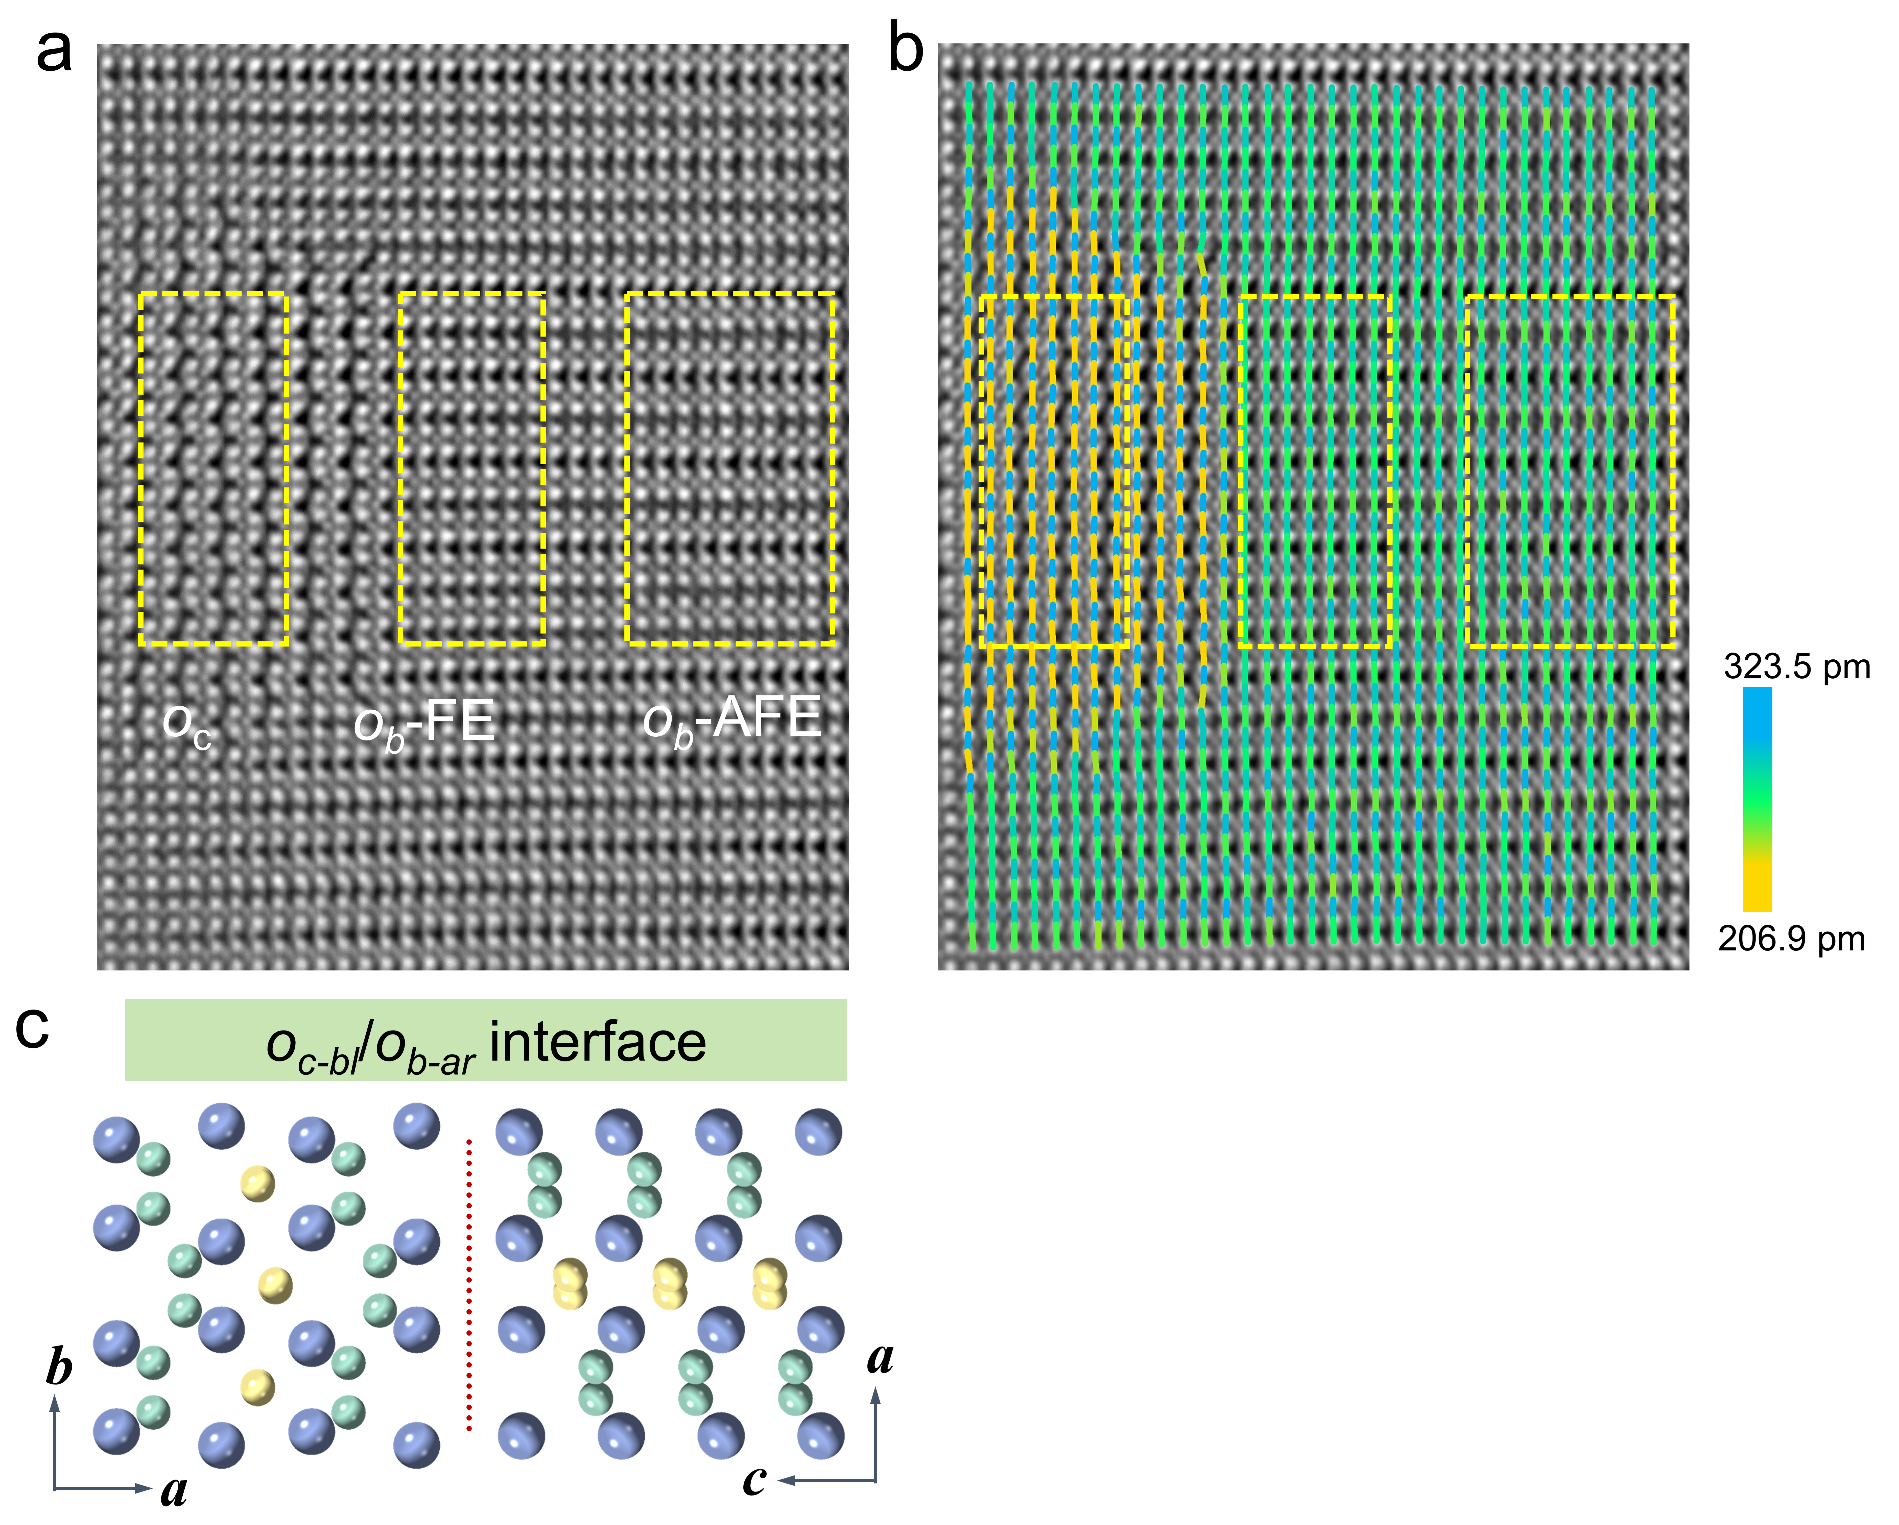


Supplementary Fig. 14. Observed *oc*-*bl*/*ob*-*ar*-typecoherent interface between the *c*-axis and *b*-axis oriented *o*-phases within the Lu:HZO crystal. a, Raw iDPC-STEM image for the *oc*-*bl*/*ob*-*ar*-type coherent interface. b, Vertical Hf-Hf atomic distance distribution. c, Corresponding atomic-arrangement diagram of the *oc*-*bl*/*ob*-*ar*-type coherent interface. The strains are calculated based on the average Hf-Hf bond length of the region enclosed by the dashed line in different *o*-phases. The statistical average vertical strain of the *oc* phase at the coherent interface is ~2%. Scale bar: 1 nm.


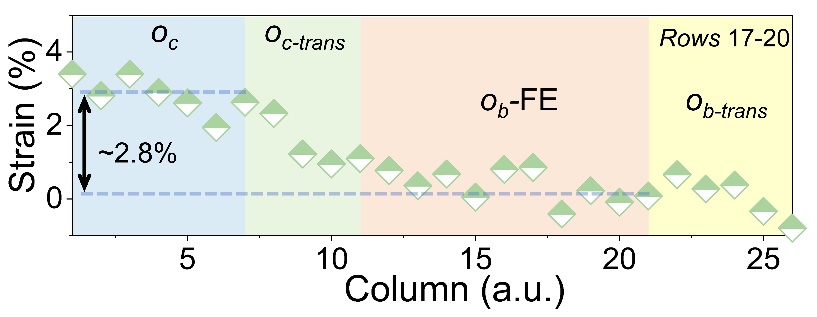


Supplementary Fig. 15. Vertical strain evolution across the interface between the *b*-axis and *c*-axis oriented *o*-phases. Quantified along *Rows* 17−20 (in Fig. 4a,b) at the interface between differently oriented *o*-phases.


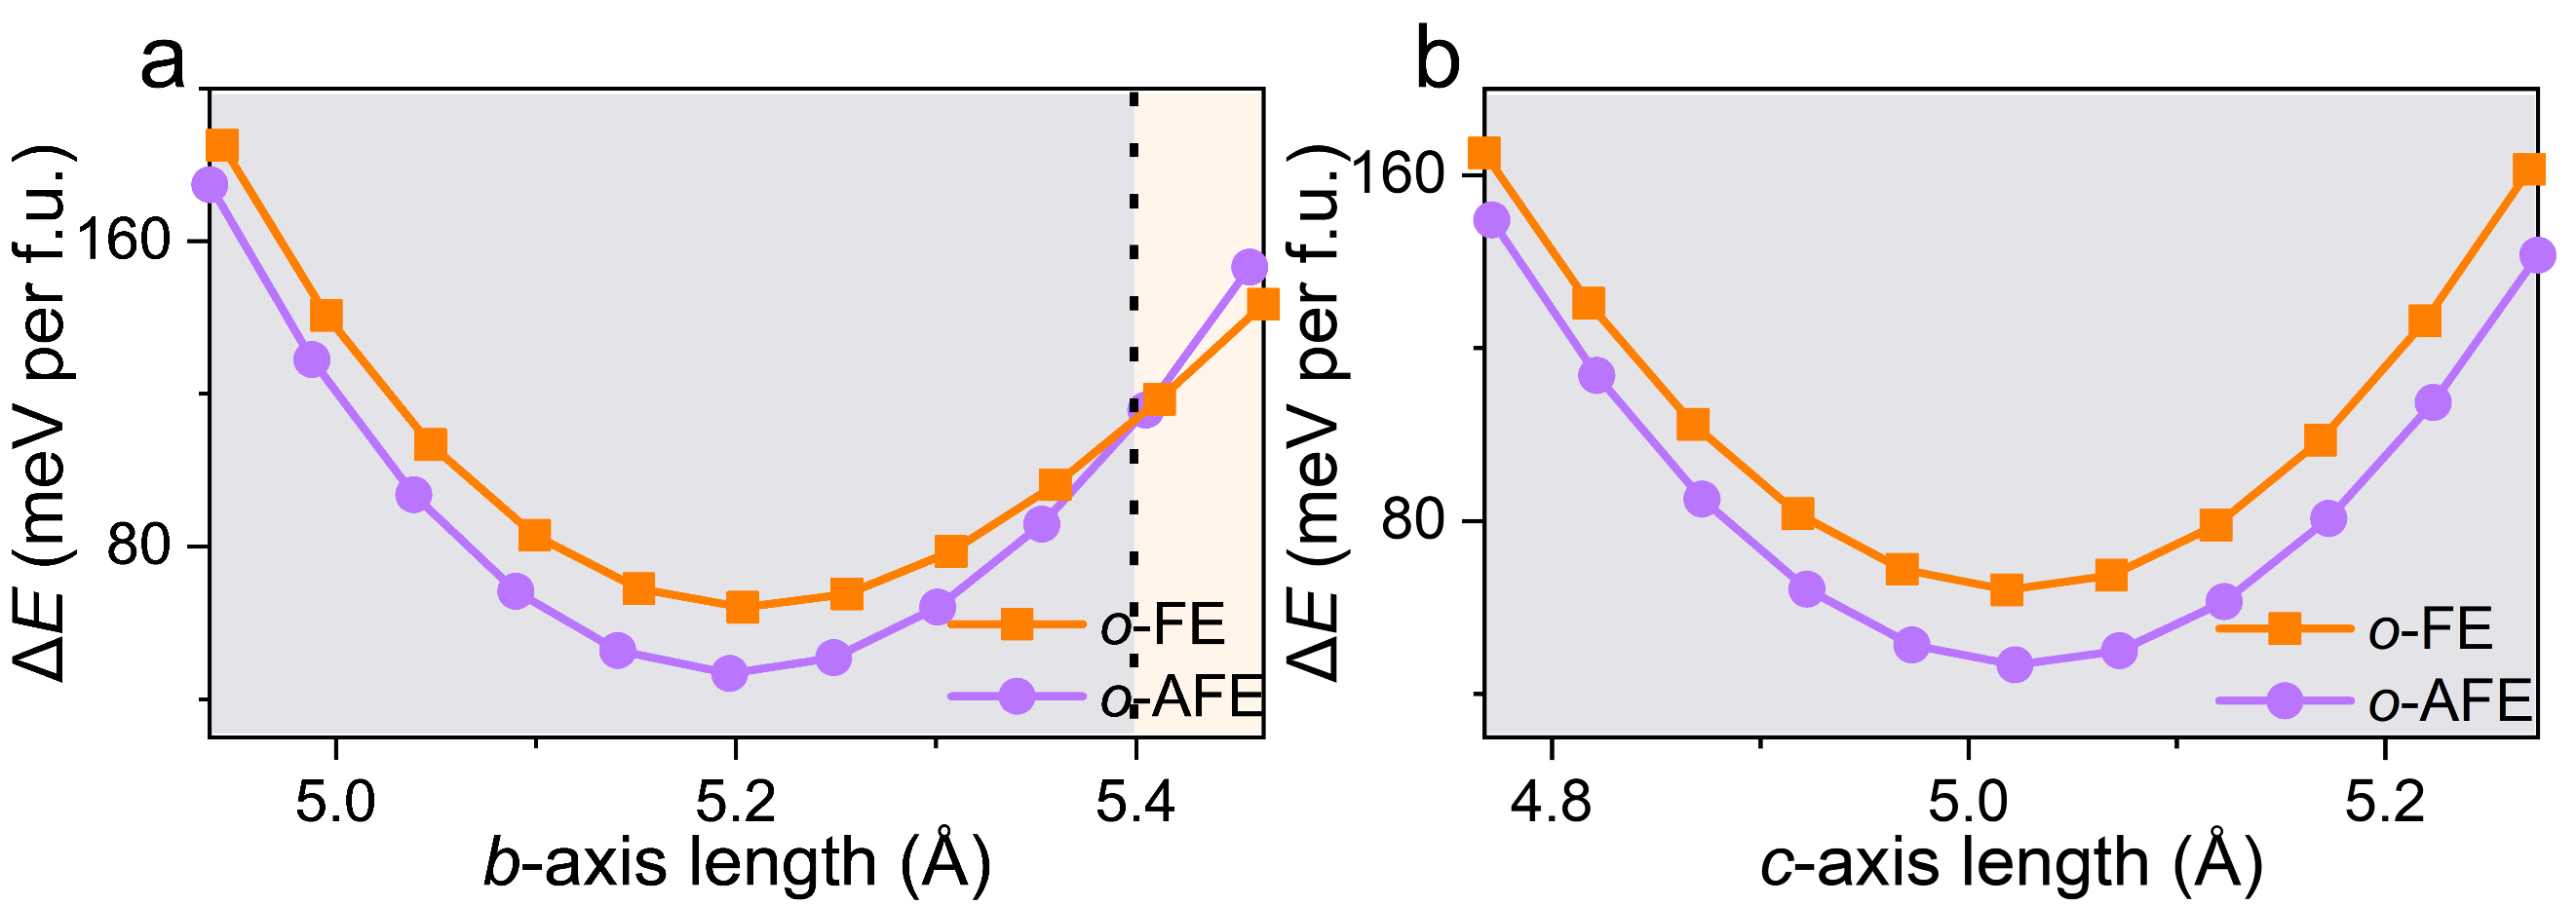


Supplementary Fig. 16. Relative formation energies of *o*-phases under uniaxial strain. a, Along *b*-axis orientation. b, Along *c*-axis orientation. The formation energy difference Δ*E* = *E* −*Em*,where *E* and *Em* represent the formation energies of the *o* phases and the *m* phase.


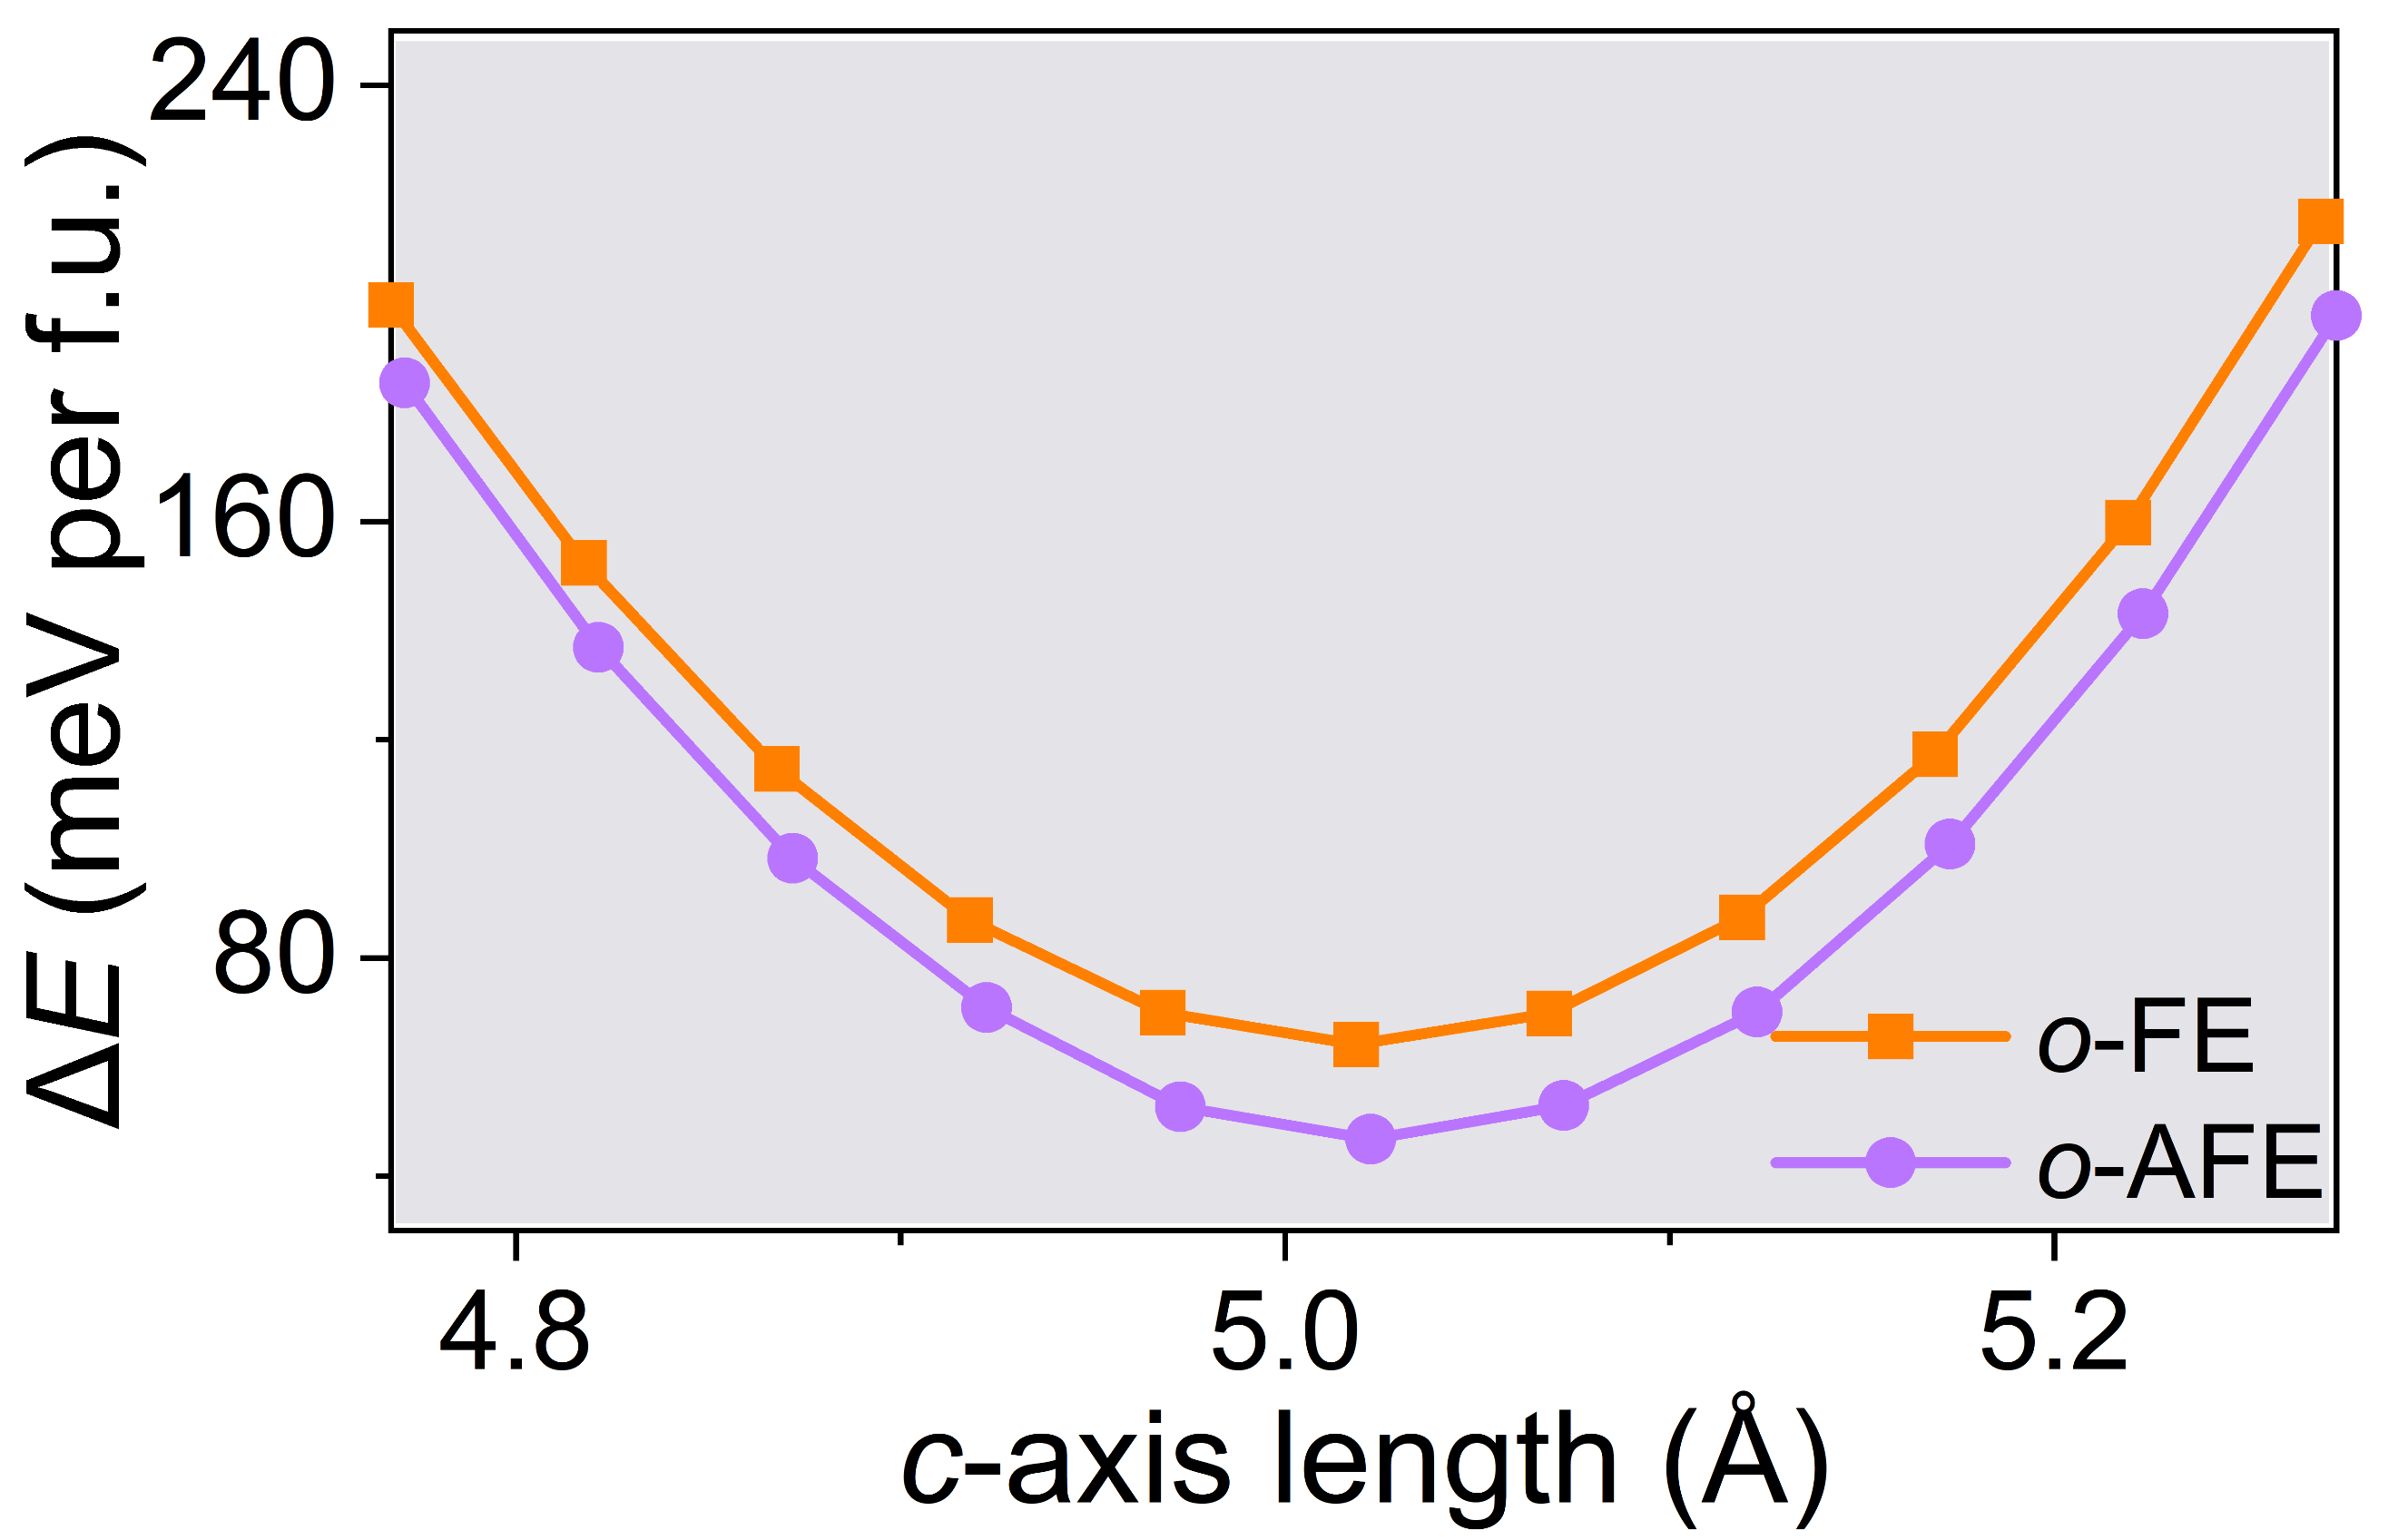


Supplementary Fig. 17. Relative formation energies of *o*-phases under biaxial strain. The strains applied along the *c*-axis and *b*-axis are oriented in opposite directions. For instance, with tensile strain along the *a*-axis and compressive strain along the *b*-axis, or vice versa.

**
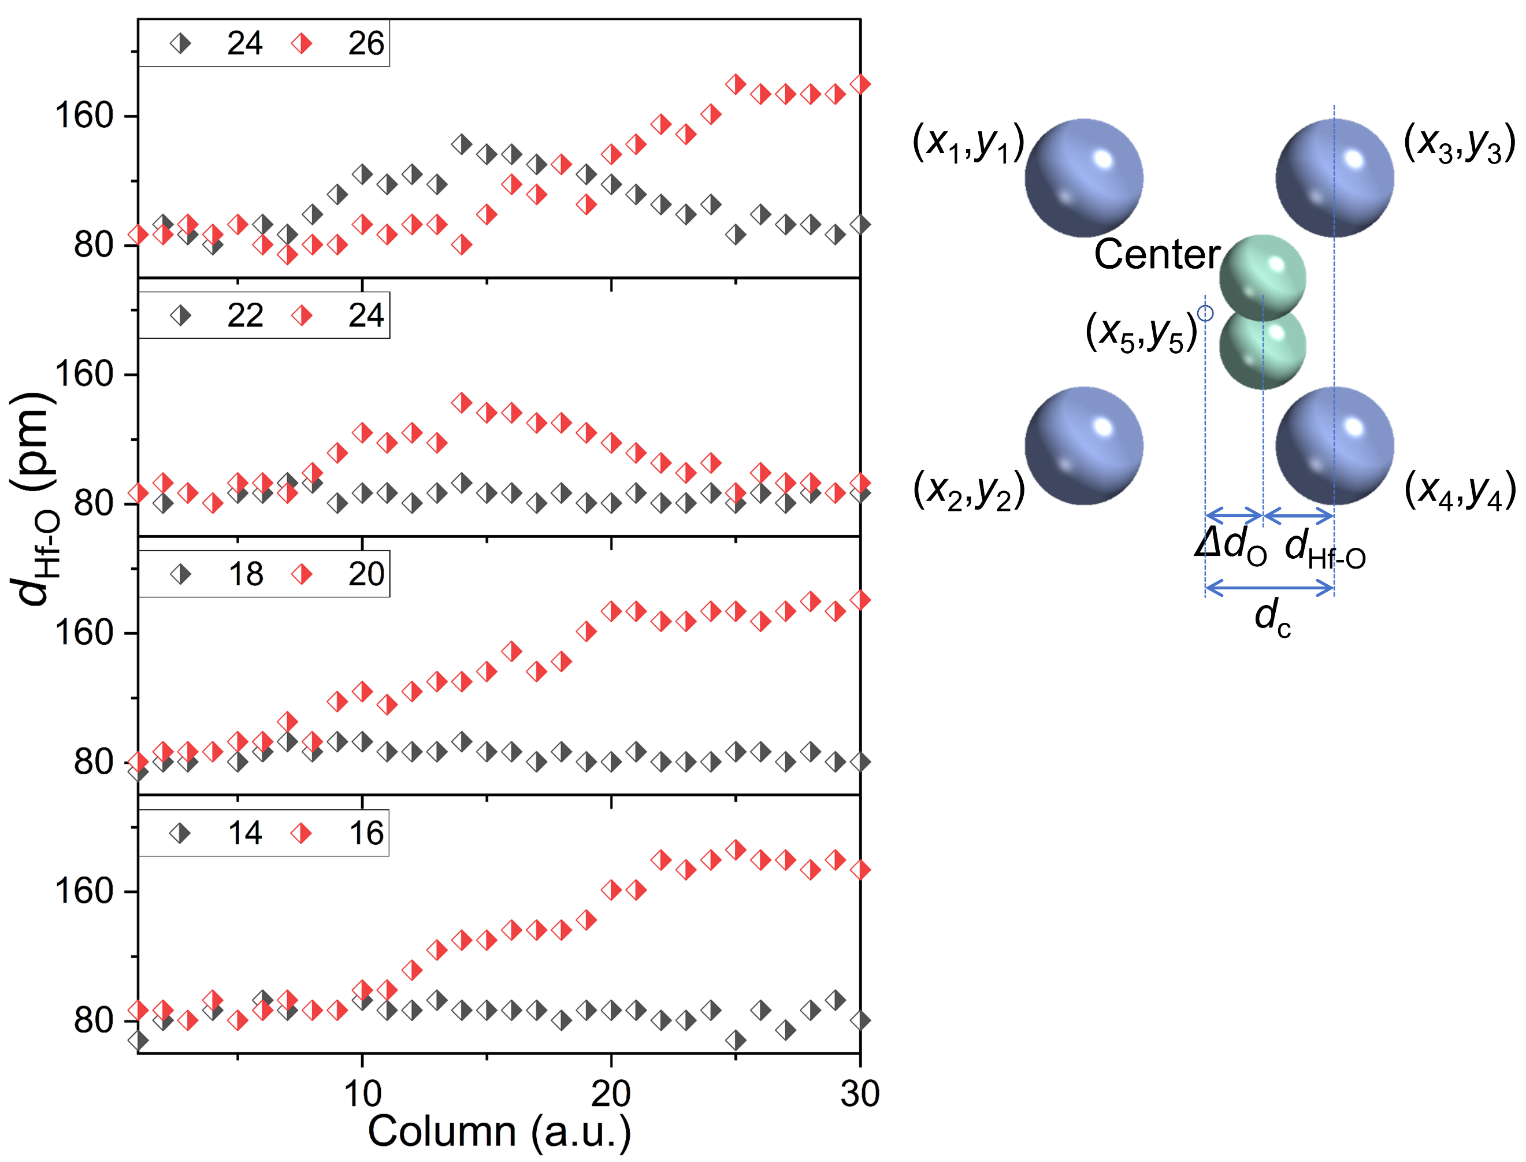
**

Supplementary Fig. 18. Evolution of the Hf-O distance (*d*Hf-O) for *o*-phases transitioning from the *oc* to the *ob*-FE phase (corresponding to Fig. 5). Inset: The center position of the Hf atom cell is denoted as (*x*5, *y*5). This position is calculated as: (*x*5, *y*5) = (1/4(*x*1*+x*2*+x*3*+x*4), 1/4(*x*1*+x*2*+x*3*+x*4)). The displacement of the O atoms relative to this center position is defined as Δ*d*O = *d*c − *d*Hf-O (shown in the inset). The polarization direction correlates with Δ*d*O: Δ*d*O > 0 corresponds to the left polarization vector, while Δ*d*O < 0 corresponds to the right polarization vector.


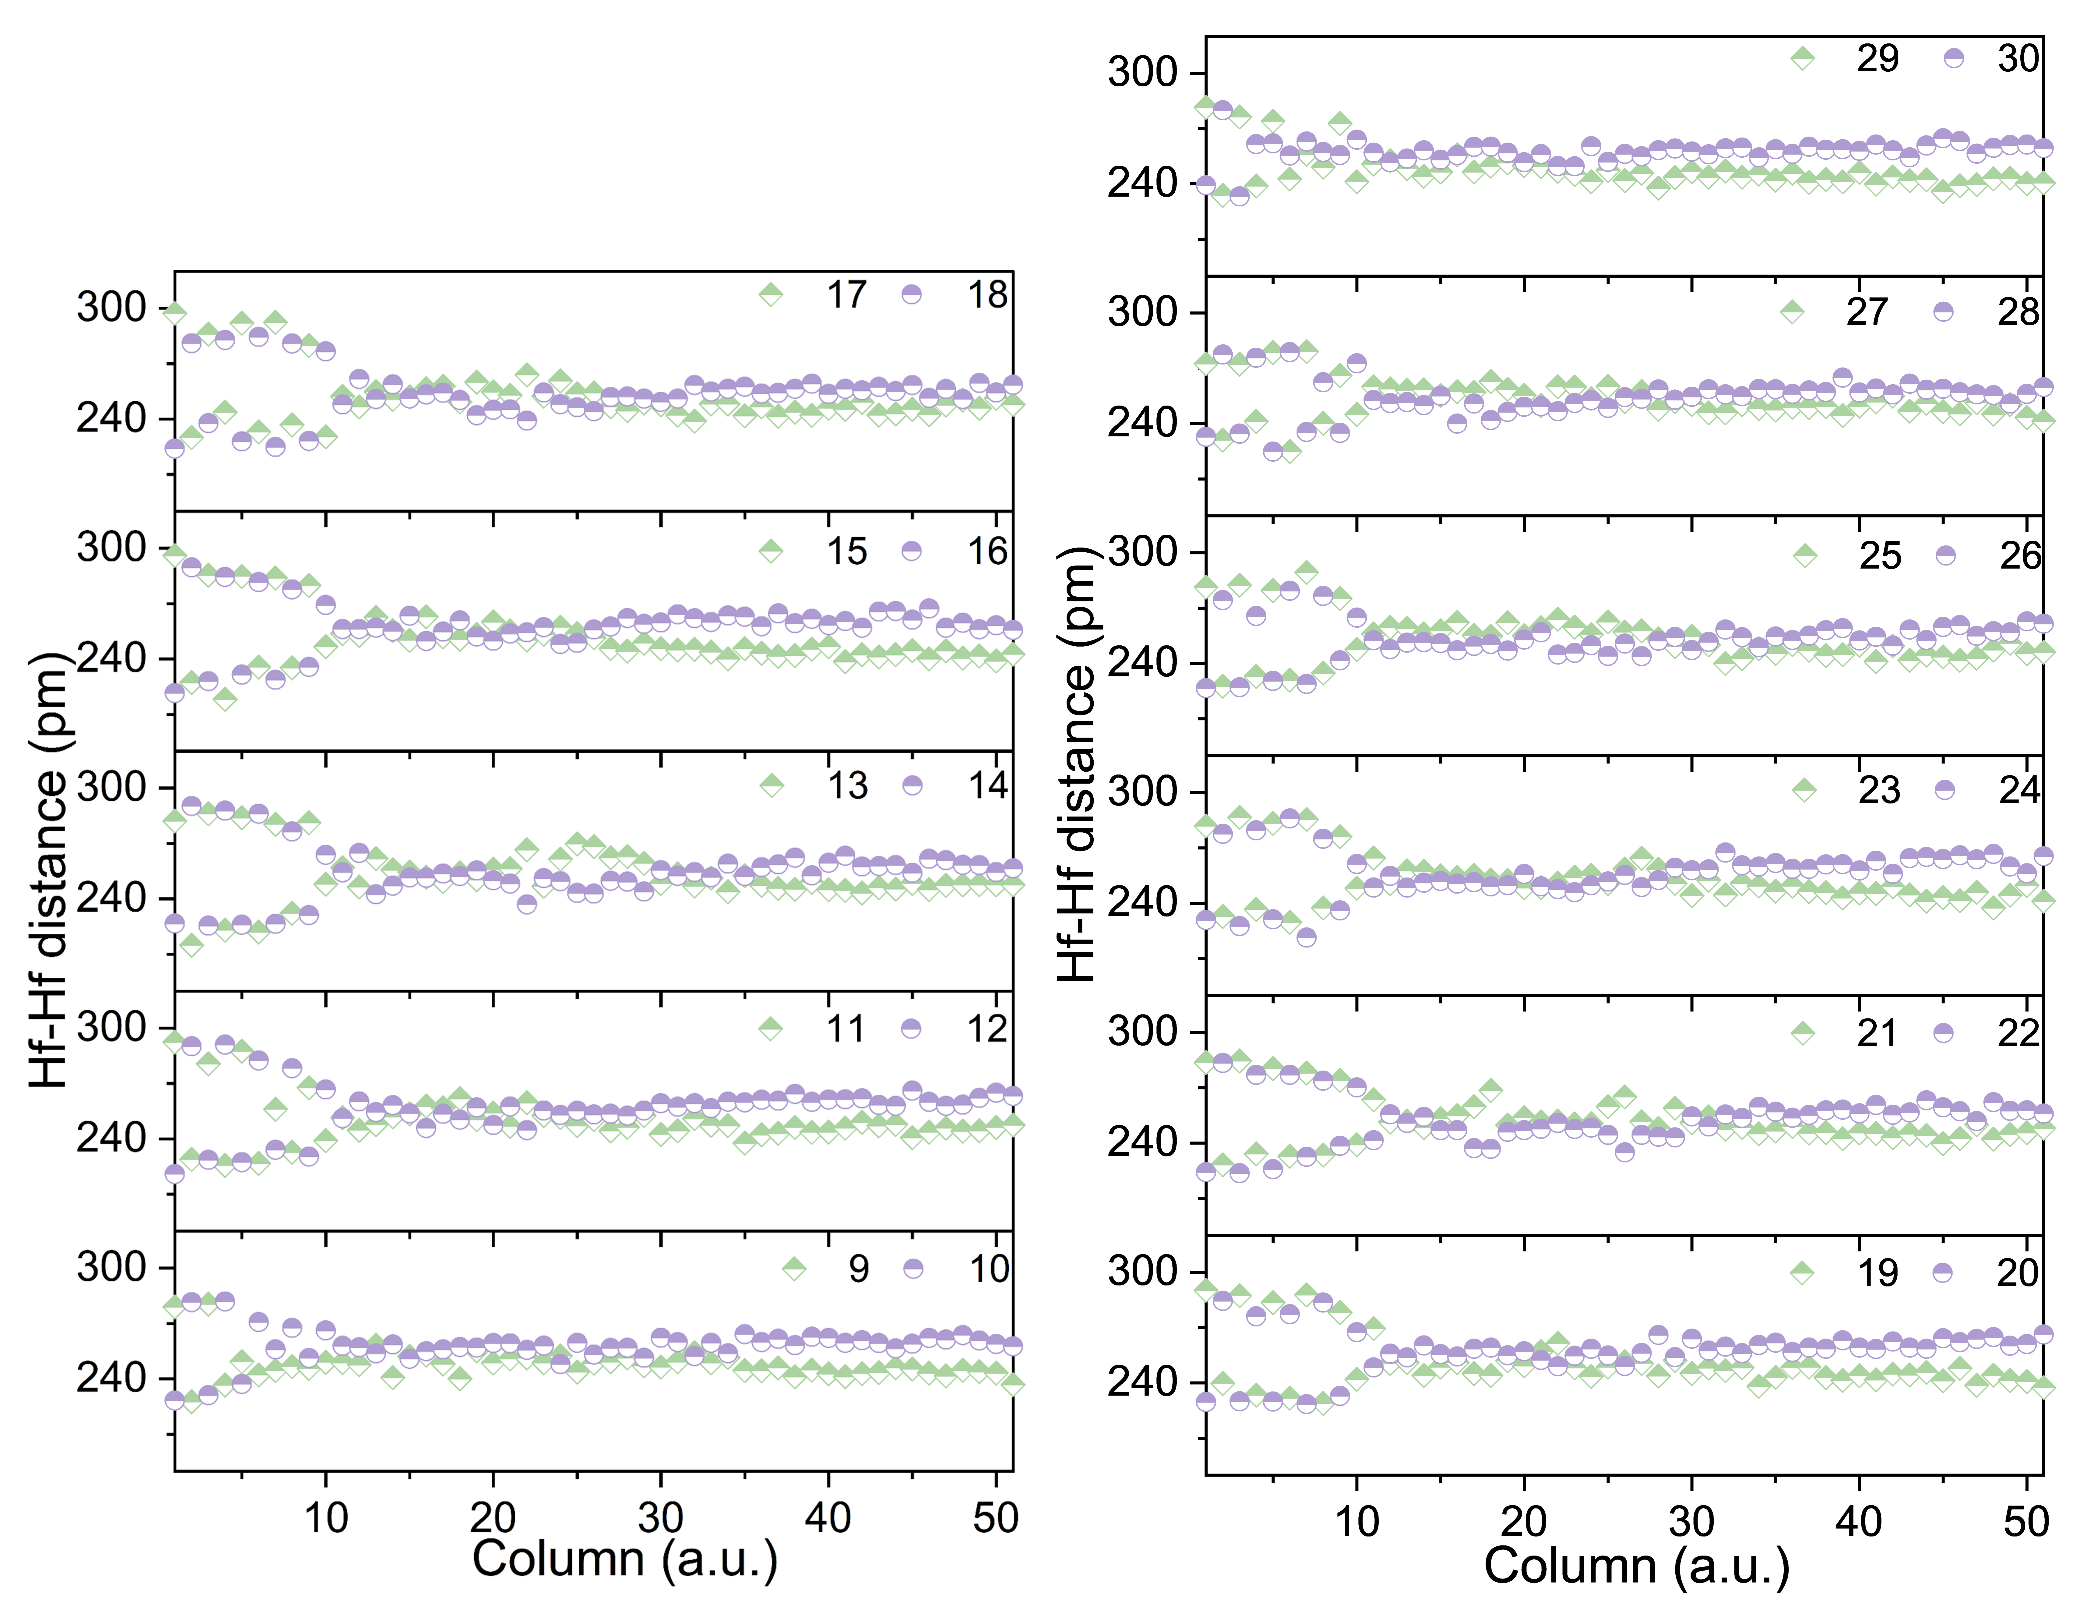


Supplementary Fig. 19. Vertical Hf-Hf distance profiles across *o*-phase regions. Quantified variations along *Rows* 9-30 spanning the *oc*, *ob*-FE, and *ob*-AFE phase regions in Supplementary Fig. 13.

**Supplementary Table S1. Refined lattice parameters of the *t*, *o*-AFE, and *o*-FE phases within the Lu:HZO (9.25 at. %) bulk crystal*.***

| Phase | *a* (Å) | *b* (Å) | *c* (Å) |
| --- | --- | --- | --- |
| *t* | 3.6085 | 3.6085 | 5.1392 |
| *o-*AFE | 10.1580 | 5.1914 | 5.0874 |
| *o-*FE | 5.0756 | 5.2215 | 5.0550 |

**Supplementary Table S2. Types of coherent *o*-phase interfaces (Fig. 2b).**

| No. | Interface type | Strain group |
| --- | --- | --- |
| 1 | *ob-al*/*ob-ar* (*oa-bl*/*oa-br*) | Weak (*Group* 1) |
| 2 | *oc-bl*/*oc-br* (*ob-cl*/*ob-cr*) |
| 3 | *oc-al*/*oc-ar* (*oa-cl*/*oa-cr*) |
| 4 | *ob-al*/*ob-cr* (*oa-bl*/*oc-br*) |
| 5 | *oc-bl*/*oa-br* (*ob-cl*/*ob-ar*) |
| 6 | *oc-al*/*oa-cr* (*oa-cl*/*oc-ar*) |
| 7 | *oc-bl*/*oc-ar* (*ob-cl*/*oa-cr*) | Uniaxial tension  (*Group* 2) |
| 8 | *ob-al*/*oc-ar* (*oa-bl*/*oa-cr*) |
| 9 | *ob-al*/*oa-cr* (*oa-bl*/*oc-ar*) |
| 10 | *oc-bl*/*oa-cr* (*ob-cl*/*oc-ar*) |
| 11 | *oc-al*/*oc-br* (*oa-cl*/*ob-cr*) | Uniaxial compression  (*Group* 3) |
| 12 | *oc-al*/*ob-ar* (*oa-cl*/*oa-br*) |
| 13 | *oc-al*/*oa-br* (*oa-cl*/*ob-ar*) |
| 14 | *oc-al*/*ob-cr* (*oa-cl*/*oc-br*) |
| 15 | *ob-al*/*oa-br* (*oa-bl*/*ob-ar*) | Biaxial (*Group* 4) |
| 16 | *ob-al*/*oc-br* (*oa-bl*/*ob-cr*) |
| 17 | *oc-bl*/*ob-ar* (*ob-cl*/*oa-br*) |
| 18 | *oc-bl*/*ob-cr* (*ob-cl*/*oc-br*) |

**Reference**

1 Wang, S. *et al.* Unlocking the phase evolution of the hidden non-polar to ferroelectric transition in HfO2-based bulk crystals. *Nat. Commun.* **16**, 3745 (2025).

2 Kresse, G. & Furthmüller, J. Efficient iterative schemes for ab initio total-energy calculations using a plane-wave basis set. *Phys. Rev. B* **54**, 11169-11186 (1996).

3 Kresse, G. & Furthmüller, J. Efficiency of *ab*-initio total energy calculations for metals and semiconductors using a plane-wave basis set. *Comput. Mater. Sci.* **6**, 15-50 (1996).

4 Perdew, J. P. *et al.* Restoring the density-gradient expansion for exchange in solids and surfaces. *Phys. Rev. Lett.* **100**, 039902 (2009).

5 Musfeldt, J. L. et al. Structural phase purification of bulk HfO2:Y through pressure cycling. *PNAS* **121**, e2312571121 (2024).

6 Qi, Y. *et al.* Stabilization of competing ferroelectric phases of HfO2 under epitaxial strain. *Phys. Rev. Lett.* **125**, 257603 (2020).

7 Fan, S. *et al.* Vibrational fingerprints of ferroelectric HfO2. *npj Quantum Mater.* **7**, 32 (2022).
